# Supplementary material
Source: PubMed Central journal article supplement (PMC3982775)
Supplement: supp_pp.113.230284_230284Supplemental_Data_PP0301.pdf [file supp_pp.113.230284_230284Supplemental_Data_PP0301.pdf]

# Supplemental Data

## Table of Contents

|                                                                                                                                     |           |
|-------------------------------------------------------------------------------------------------------------------------------------|-----------|
| <b>1. Supplemental Figures .....</b>                                                                                                | <b>2</b>  |
| 1.1 Figure S1 .....                                                                                                                 | 2         |
| 1.2 Figure S2 .....                                                                                                                 | 3         |
| 1.3 Figure S3-S6 .....                                                                                                              | 4         |
| 1.4 Figure S7 .....                                                                                                                 | 6         |
| 1.5 Figure S8 .....                                                                                                                 | 7         |
| 1.6 Figure S9 .....                                                                                                                 | 8         |
| <b>2. Supplemental Tables .....</b>                                                                                                 | <b>9</b>  |
| 2.1 Table S1 .....                                                                                                                  | 9         |
| 2.2 Table S2 .....                                                                                                                  | 11        |
| <b>3. Supplemental Data S1: List of Abbreviations and Their Definitions ....</b>                                                    | <b>13</b> |
| 3.1 Metabolites .....                                                                                                               | 13        |
| 3.2 Enzymes and Numbering .....                                                                                                     | 15        |
| 3.3 Metabolite Transport Process .....                                                                                              | 17        |
| <b>4. Supplemental Data S2: Equations .....</b>                                                                                     | <b>17</b> |
| 4.1 Rate Equations .....                                                                                                            | 17        |
| 4.2. Differential Equations .....                                                                                                   | 29        |
| 4.3. Constants .....                                                                                                                | 34        |
| <b>5. Supplemental Data S3: Parameters .....</b>                                                                                    | <b>37</b> |
| 5.1 Vmax of photosynthetic enzymes .....                                                                                            | 37        |
| 5.2 Michaelis-constant and other parameters .....                                                                                   | 39        |
| 5.3 The volume of different compartments .....                                                                                      | 49        |
| 5.4 Initial value of metabolite concentrations .....                                                                                | 49        |
| 5.5 Molecular weights and catalytic numbers .....                                                                                   | 52        |
| <b>6. Additional explanations .....</b>                                                                                             | <b>54</b> |
| 6.1 Supplemental Data S4: Rationale underlying the choice of the default CO <sub>2</sub> permeability coefficient .....             | 54        |
| 6.2 Supplemental Data S5: Rationale underlying the choice of the rate equation used to calculate CO <sub>2</sub> uptake rates ..... | 54        |
| <b>7. Reference .....</b>                                                                                                           | <b>56</b> |

# 1. Supplemental Figures

## 1.1. Figure S1

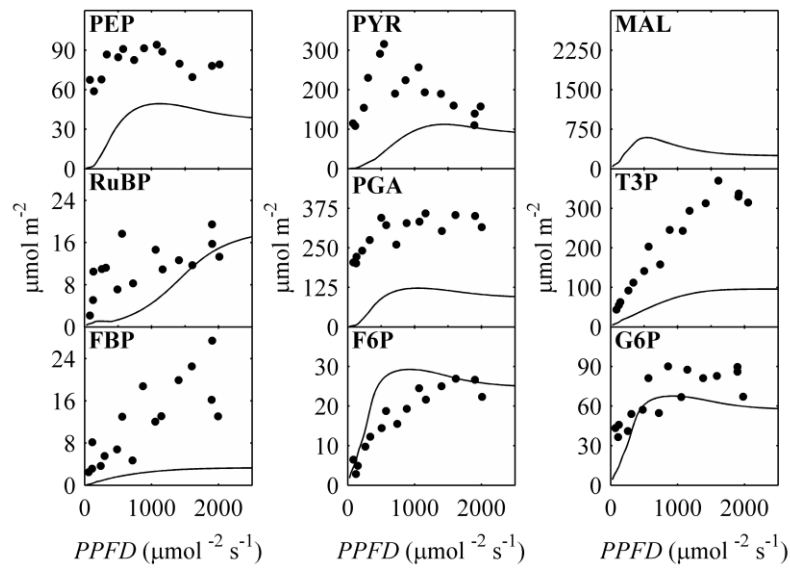

**Supplemental figure S1** Predicted changes in contents of key metabolites with changes in PPFD. As for Figure 3, but the response of metabolites to light. The intercellular CO<sub>2</sub> concentration ( $C_i$ ) used in the simulation was 15 Pa.

1.2. Figure S2

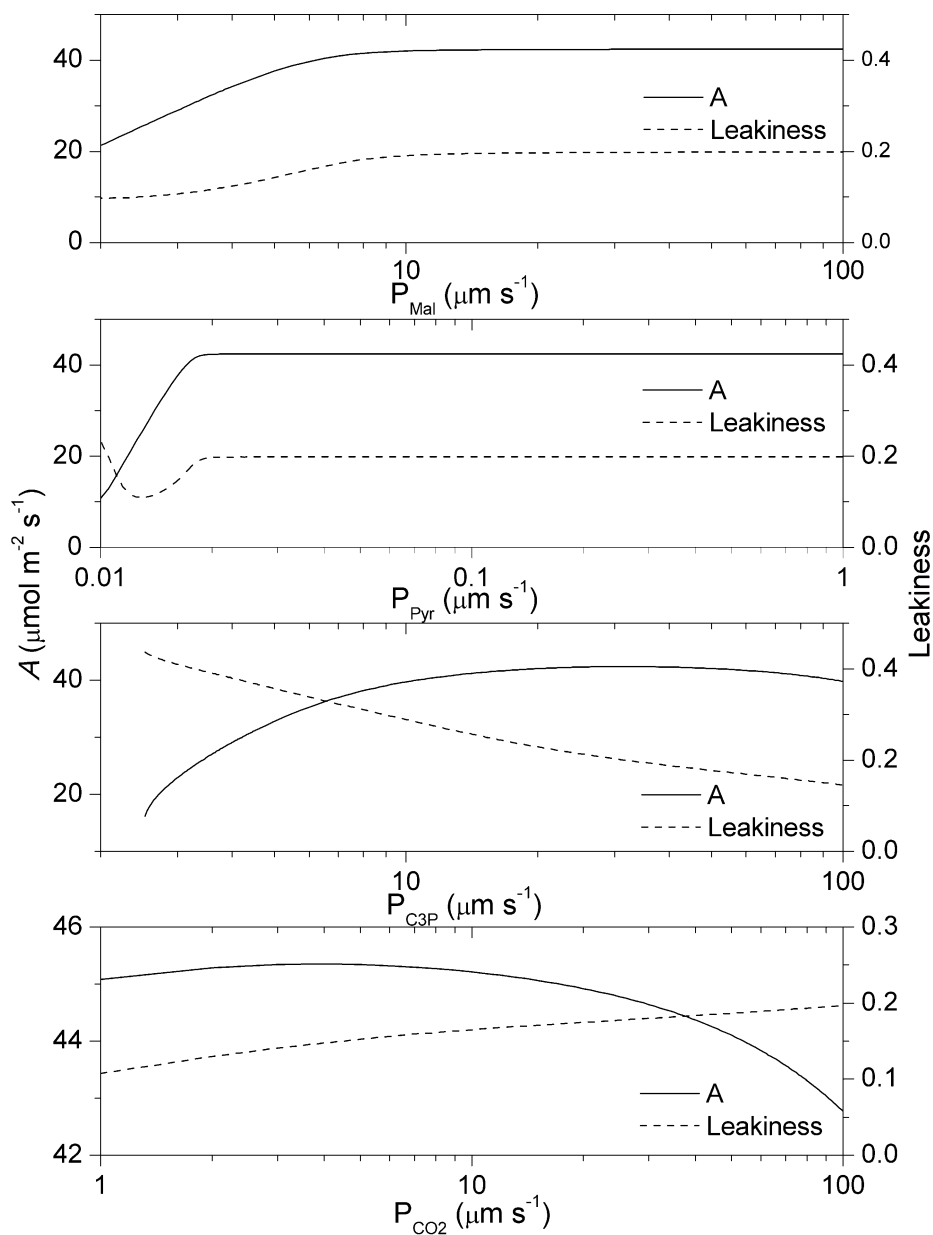

**Figure S2** Effects of metabolite permeability between BSC and MC on A and CO<sub>2</sub> leakiness. A), B) C) and D) show the response to increase in permeability to malate ( $P_{\text{Mal}}$ ), pyruvate ( $P_{\text{Pyr}}$ ), C3P ( $P_{\text{C3P}}$ ) and CO<sub>2</sub> ( $P_{\text{CO}_2}$ ), respectively.

1.3. Figure S3-S6

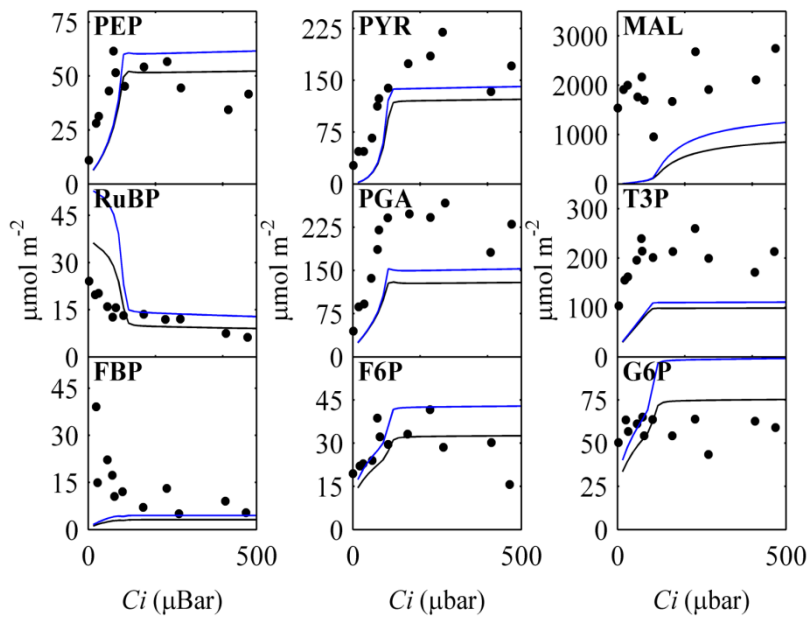

**Figure S3 Phosphate concentration effects on steady-state contents of key metabolites of photosynthetic carbon metabolism.** Blue lines represent the metabolite contents if increase phosphate concentration 20% in the model.

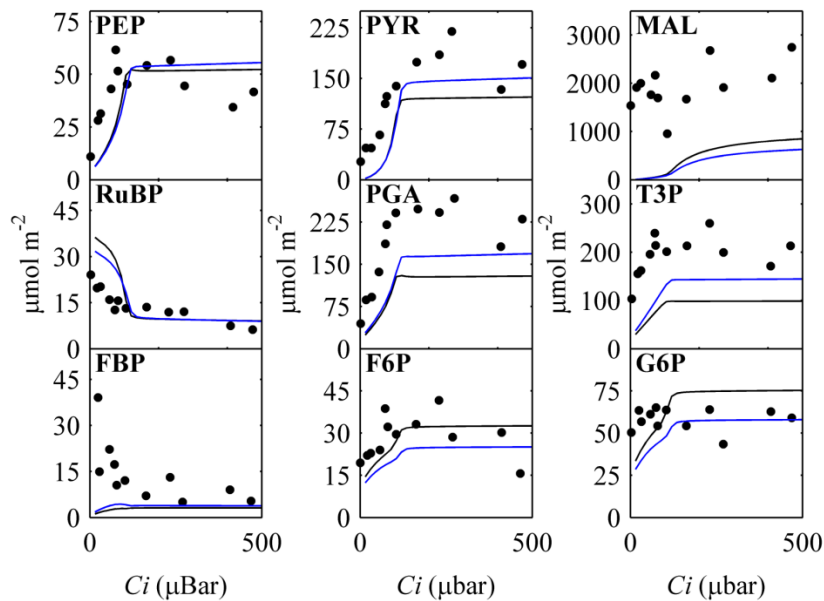

**Figure S4 PGA and T3P related enzyme kinetic parameters effects on steady-state contents of key metabolites of photosynthetic carbon metabolism.** Blue lines represent the metabolite contents if increase  $K_m$ s of PGA and T3P of related enzymes by 50%. PGA and T3P related enzyme means enzyme which use them as substrates or products.

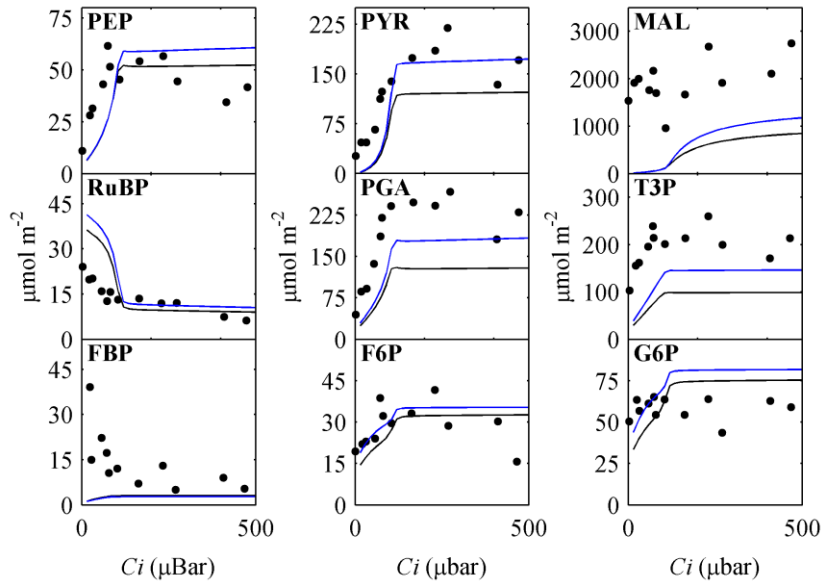

**Figure S5 Phosphate concentration and enzyme kinetic parameters effects on key metabolites contents.** Blue lines represent the metabolite contents if increase phosphate concentration 20% and  $K_m$ s of triose phosphates and PGA 50% together.

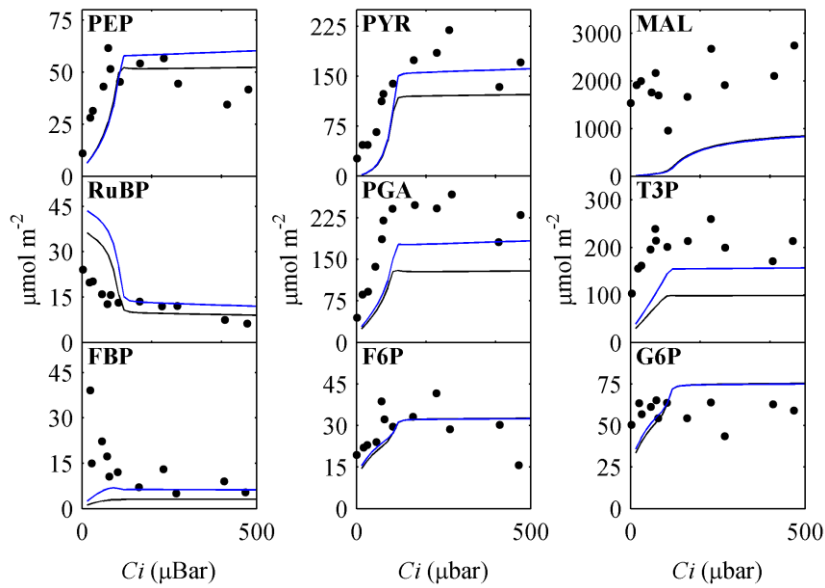

**Figure S6 Cytosolic FBPase enzyme kinetic parameters effects on key metabolites contents.** Blue lines represent the metabolite contents with changed  $K_m$  of FBP of cytosolic FBPase from 0.00108 to 0.05, in addition to modification of phosphate concentration,  $K_m$ s of triose phosphates and PGA

1.4. Figure S7

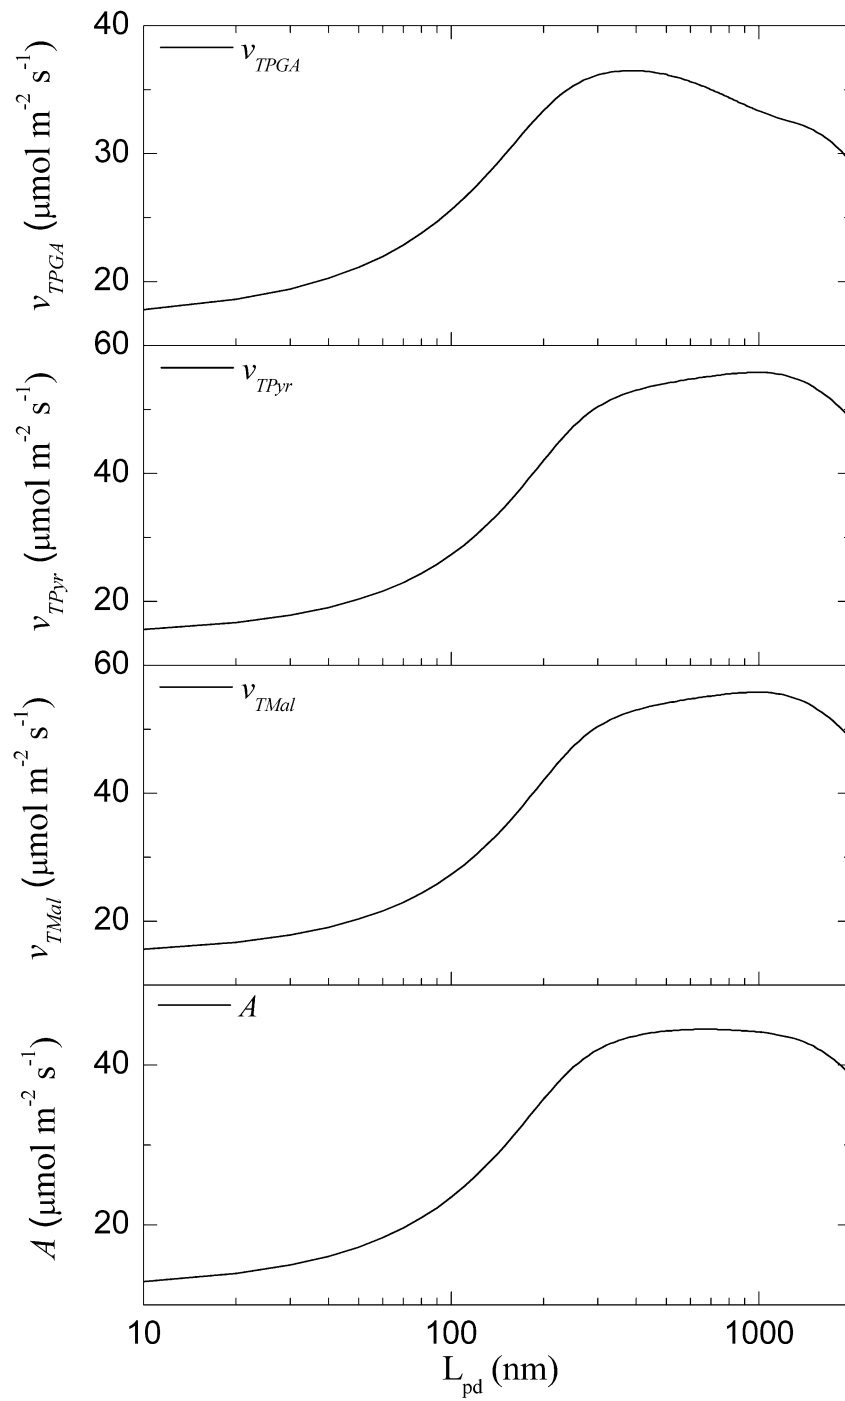

Figure S7 Effect of plasmodesmata length on  $A$  and metabolite fluxes between MCs and BSCs.

1.5. Figure S8

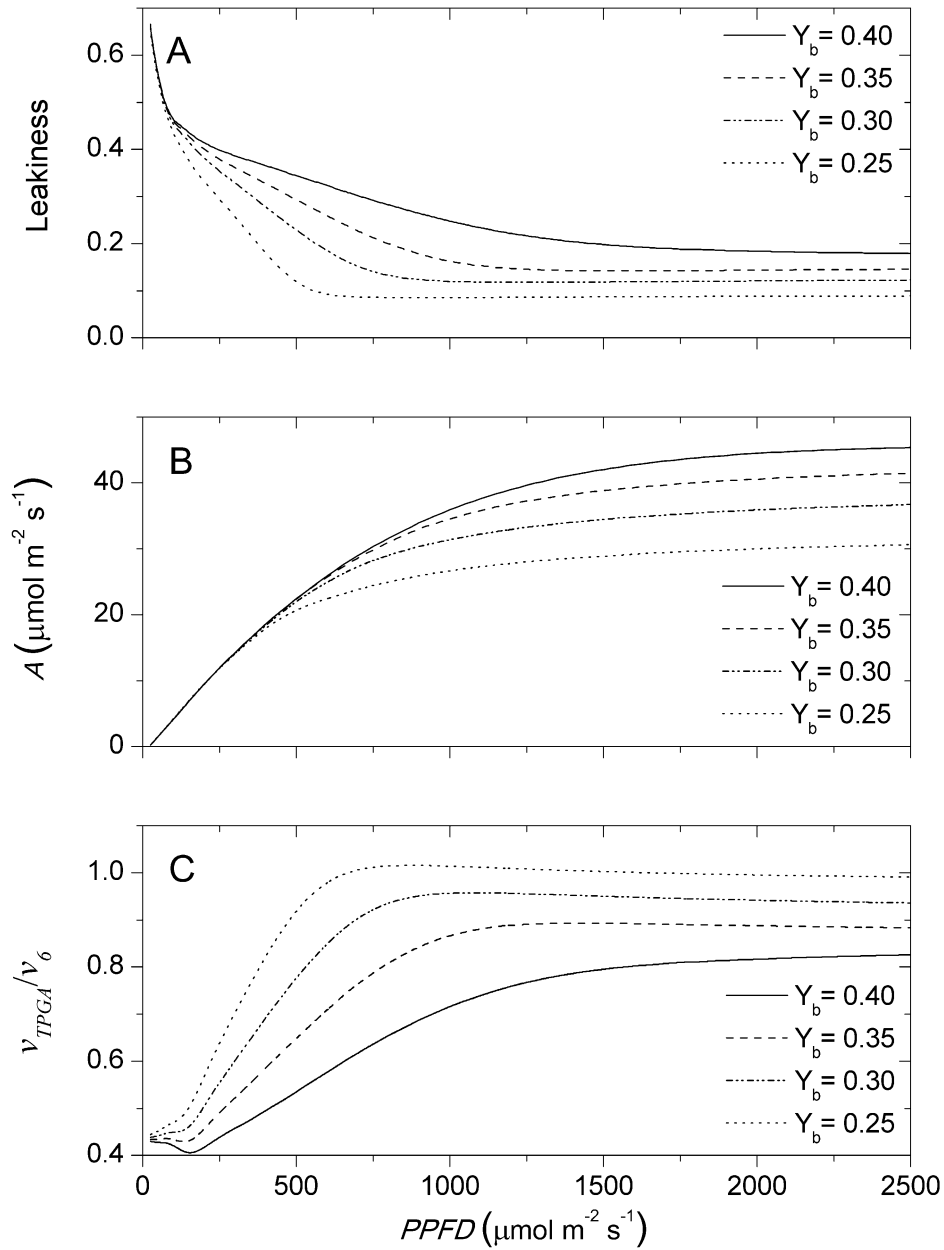

**Figure S8** The proportion of  $J_{max\_T}$  partitioned into BSC ( $Y_b$ ) influences  $\text{CO}_2$  leakiness,  $A$  and proportion of PGA transported to MCs. Here  $v_{TPGA}$  is the rate of PGA transport from BSC to MC and  $v_c$  is the rate of RuBP carboxylation.

1.6. Figure S9

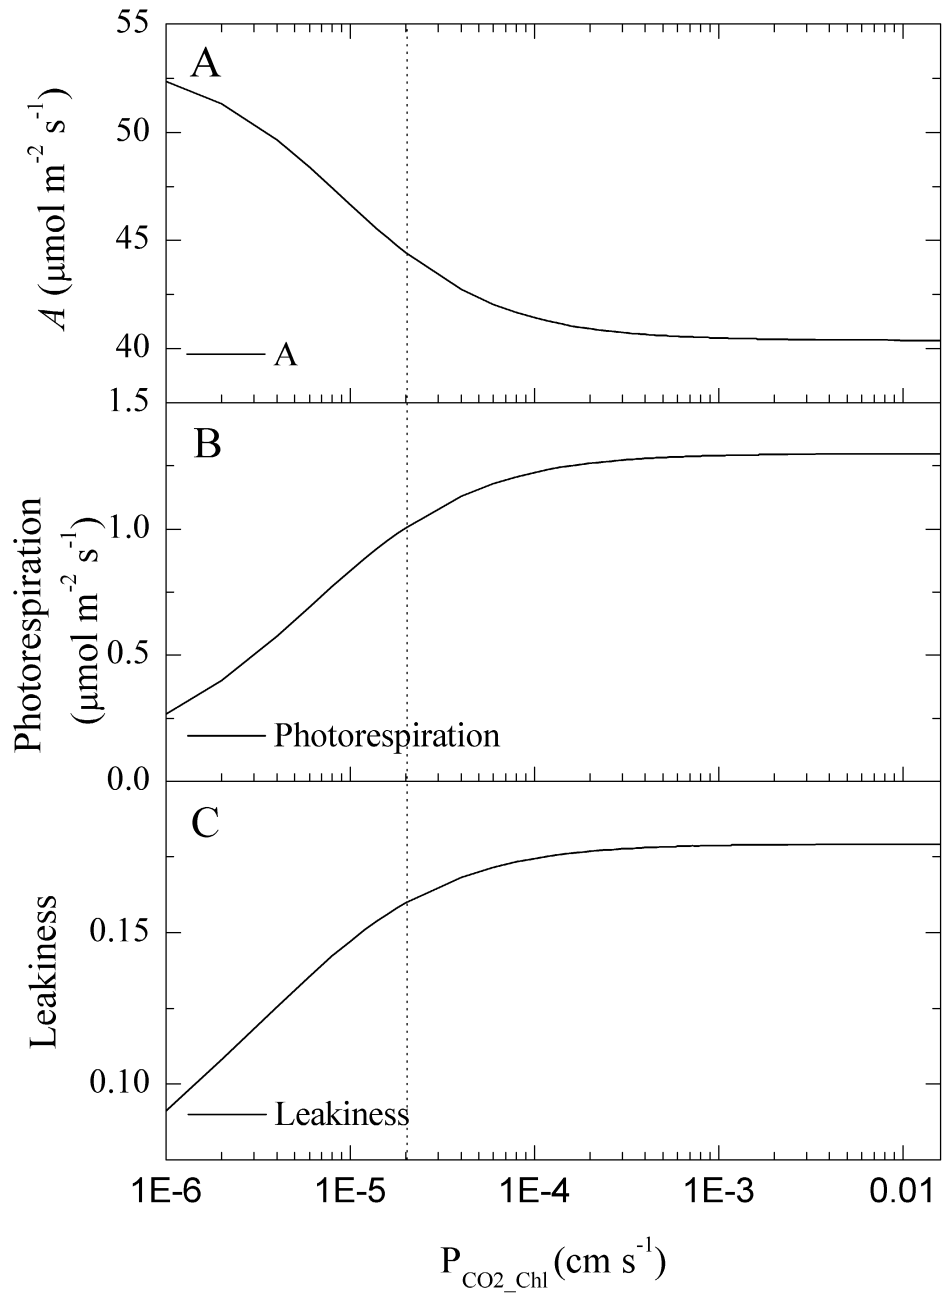

**Figure S9** The effect of the chloroplast envelope permeability to CO<sub>2</sub> on photosynthesis, photorespiration and leakiness. (A) photosynthesis, (B) photorespiration and (C) leakiness. The dotted line represents the value used in the model.



## 2. Supplemental Tables

### 2.1 Table S1

**Table S1 Photosynthetic flux control coefficients of enzymes and diffusion related parameters.** We simulated the following scenarios: High light:  $PPFD=2000 \mu\text{mol m}^{-2} \text{s}^{-1}$ ,  $C_i=15 \text{ Pa}$ . Low light:  $PPFD=200 \mu\text{mol m}^{-2} \text{s}^{-1}$ ,  $C_i=15 \text{ Pa}$ . Low  $\text{CO}_2$ :  $PPFD=2000 \mu\text{mol m}^{-2} \text{s}^{-1}$ ,  $C_i=5 \text{ Pa}$ . **Blue: the flux control coefficient of  $V_{\text{max}}$ , which decreased by 20%. During the calculation,  $V_{\text{max}}$  of other enzymes didn't change.**

| Abbreviation           | EC Number<br>or Legend | $V_{\text{max}}$<br>( $\mu\text{mol m}^{-2} \text{s}^{-1}$ ) | Flux Control Coefficient |                       |                       |
|------------------------|------------------------|--------------------------------------------------------------|--------------------------|-----------------------|-----------------------|
|                        |                        |                                                              | High Light               | Low $\text{CO}_2$     | Low Light             |
| CA                     | 4.2.1.1                | 200000<br>(160000)                                           | 0.001(0.001)             | <b>0.185(0.221)</b>   | 0.000(0.000)          |
| PEPC                   | 4.1.1.31               | 170(136)                                                     | 0.004( <b>0.128</b> )    | <b>0.364(0.457)</b>   | 0.000(0.000)          |
| NADP-MDH               | 1.1.1.82               | 90(72)                                                       | 0.000(0.000)             | 0.000(0.000)          | 0.000(0.000)          |
| NADP-ME                | 1.1.1.40               | 90(72)                                                       | 0.002(0.014)             | 0.010(0.015)          | 0.000(0.000)          |
| PPDK                   | 2.7.9.1                | 90(72)                                                       | 0.000(0.000)             | 0.000(0.000)          | 0.000(0.000)          |
| Rubisco_ $\text{CO}_2$ | 4.1.1.39               | 65(52)                                                       | <b>0.254(0.956)</b>      | <b>0.099(0.157)</b>   | <b>0.073(0.095)</b>   |
| PGAK<br>&GAPDH         | 2.7.2.3&1.2.1.13       | 225(180)                                                     | 0.020( <b>0.399</b> )    | 0.001(0.003)          | -0.005(0.000)         |
| Aldolase               | 4.1.2.13FBP            | 58.5(46.8)                                                   | -0.020(-0.021)           | -0.008(-0.011)        | -0.005(-0.005)        |
| FBPase                 | 3.1.3.11               | 43.6(34.9)                                                   | 0.004(0.017)             | -0.009(-0.009)        | -0.007(-0.006)        |
| Aldolase               | 4.1.2.13SBP            | 109.7(87.8)                                                  | 0.012(0.018)             | 0.000(0.000)          | 0.007(0.006)          |
| SBPase                 | 3.1.3.37               | 29.2(23.4)                                                   | <b>0.030(0.076)</b>      | 0.000(0.001)          | 0.010(0.014)          |
| Transketolase          | 2.2.1.1X               | 281(224.8)                                                   | 0.003(0.004)             | 0.000(0.000)          | 0.001(0.001)          |
| Transketolase          | 2.2.1.1R               | 281(224.8)                                                   | 0.000(0.001)             | 0.000(0.000)          | 0.000(0.001)          |
| PRK                    | 2.7.1.19               | 1170(936)                                                    | 0.026( <b>0.040</b> )    | 0.000(0.000)          | 0.028( <b>0.033</b> ) |
| PGAK_M<br>&GAPDH_M     | 2.7.2.3M<br>&1.2.1.13M | 300(240)                                                     | 0.002(0.036)             | <b>-0.123(-0.102)</b> | 0.009(0.011)          |
| Rubisco_ $\text{O}_2$  | 4.1.1.39               | 7.2(5.8)                                                     | -0.017(-0.014)           | 0.029(0.028)          | <b>-0.063(-0.052)</b> |
| PGCAP                  | 3.1.3.18               | 2621(2097)                                                   | 0.000(0.000)             | 0.000(0.000)          | 0.000(0.000)          |
| GO                     | 1.1.3.15;              | 72.8(58.2)                                                   | 0.000(0.000)             | 0.000(0.000)          | 0.000(0.000)          |
| GGAT                   | 2.6.1.4                | 137.3(109.8)                                                 | 0.000(0.000)             | 0.000(0.000)          | 0.000(0.000)          |
| Gly_ser                | 1.4.4.2&2.1.2.1        | 124.7(99.8)                                                  | 0.000(0.000)             | 0.000(0.000)          | 0.000(0.000)          |
| SGAT                   | 2.6.1.45               | 165.3(132.2)                                                 | 0.000(0.000)             | 0.000(0.000)          | 0.000(0.000)          |
| HPR                    | 1.1.1.29               | 500.5(400.4)                                                 | 0.000(0.000)             | 0.000(0.000)          | 0.000(0.000)          |
| GLYK                   | 2.7.1.31               | 285.8(228.6)                                                 | 0.000(0.000)             | 0.000(0.000)          | 0.000(0.000)          |
| TGCA                   |                        | 300(240)                                                     | 0.000(0.000)             | 0.000(0.000)          | 0.000(0.000)          |
| TGCEA                  |                        | 250(200)                                                     | 0.000(0.000)             | 0.000(0.000)          | 0.000(0.000)          |
| Mutase&<br>Enolase     | 5.4.2.1&4.2.1.11       | 1(0.8)                                                       | 0.000(0.000)             | 0.000(0.000)          | 0.000(0.000)          |
| Aldolase_M             | 4.1.2.13FBPM           | 8.0(6.4)                                                     | 0.004(0.004)             | 0.017(0.019)          | -0.001(-0.001)        |
| FBPase_M               | 3.1.3.11M              | 6.4(5.1)                                                     | 0.004(0.005)             | 0.017(0.018)          | -0.001(-0.001)        |

|                 |           |             |                     |                |                     |
|-----------------|-----------|-------------|---------------------|----------------|---------------------|
| UGPU            | 2.7.7.9   | 5.8(4.6)    | 0.001(0.001)        | -0.006(-0.007) | 0.000(0.000)        |
| SPS             | 2.4.1.14  | 27.8(22.2)  | 0.001(0.001)        | -0.020(-0.028) | 0.000(0.000)        |
| SPP             | 3.1.3.24  | 27.8(22.2)  | 0.000(0.000)        | 0.000(0.000)   | 0.000(0.000)        |
| PFK             | 2.7.1.105 | 1.01(0.81)  | -0.002(-0.002)      | -0.013(-0.013) | 0.000(0.000)        |
| F26BPP          | 3.1.3.46  | 0.84(0.67)  | 0.002(0.002)        | 0.013(0.014)   | 0.000(0.000)        |
| GPA             | 2.7.7.27  | 30(24)      | 0.002(0.051)        | -0.003(-0.002) | -0.033(-0.025)      |
| Diphosphatase   | 3.6.1.1   | 1000(800)   | 0.000(0.000)        | 0.000(0.000)   | -0.001(-0.001)      |
| Starch synthase | 2.4.1.21  | 25(20)      | 0.000(0.001)        | 0.000(0.000)   | 0.000(0.000)        |
| PGAsink         | PGA Sink  | 2(1.6)      | 0.005(0.004)        | -0.008(-0.006) | <b>0.037(0.033)</b> |
| ATPase          | 3.6.1.14M | 300(240)    | 0.000(0.000)        | 0.000(0.000)   | 0.000(0.000)        |
| FNR             | 1.18.1.2M | 200(160)    | 0.000(0.000)        | 0.000(0.000)   | 0.000(0.000)        |
| ATPase          | 3.6.1.14B | 300(240)    | 0.000(0.000)        | 0.000(0.000)   | 0.000(0.000)        |
| TPT             | TPT_B     | 750(600)    | 0.000(0.001)        | -0.004(-0.005) | 0.001(0.001)        |
|                 | TPT_M     | 750(600)    | 0.000(0.001)        | -0.021(-0.024) | 0.000(0.000)        |
| DiT1            | OAA_M     | 80(64)      | 0.000(0.000)        | 0.000(0.000)   | 0.000(0.000)        |
|                 | MAL_B     | 150(120)    | 0.001(0.002)        | 0.019(0.024)   | 0.000(0.000)        |
| DiT2            | MAL_M     | 150(120)    | 0.000(0.000)        | 0.000(0.000)   | 0.000(0.000)        |
|                 | PYR_B     | 150(120)    | 0.001(0.002)        | 0.000(0.000)   | 0.000(0.000)        |
| MEP             | PYR_M     | 150(120)    | 0.000(0.000)        | 0.000(0.000)   | 0.000(0.000)        |
|                 | PEP_M     | 150(120)    | 0.000(0.000)        | 0.000(0.000)   | 0.000(0.000)        |
| PPT             | PEP_M     | 150(120)    | 0.000(0.000)        | 0.000(0.000)   | 0.000(0.000)        |
| $J_{\max}$      |           | 500(400)    | <b>0.600(0.790)</b> | -0.018(-0.030) | <b>0.074(0.099)</b> |
| I               |           | 2000 or 200 | <b>0.134(0.219)</b> | -0.008(-0.012) | <b>0.969(1.057)</b> |

| Diffusion parameter    | Value                                                         | Flux Control Coefficient |                       |                       |
|------------------------|---------------------------------------------------------------|--------------------------|-----------------------|-----------------------|
|                        |                                                               | High light               | Low CO <sub>2</sub>   | Low light             |
| $g_m$                  | 7(5.6)<br>$\mu\text{mol m}^{-2} \text{s}^{-1} \text{Pa}^{-1}$ | 0.002(0.009)             | <b>0.495(0.551)</b>   | 0.000(0.000)          |
| $D_{\text{mal\_PD}}$   | $6.77(5.42) \times 10^{-10} \text{ m}^2 \text{ s}^{-1}$       | 0.000(0.001)             | <b>0.041(0.051)</b>   | 0.000(0.000)          |
| $D_{\text{Pyr\_PD}}$   | $7(5.6) \times 10^{-10} \text{ m}^2 \text{ s}^{-1}$           | 0.000(0.000)             | 0.000(0.000)          | 0.000(0.000)          |
| $D_{\text{C3P\_PD}}$   | $5.25(4.2) \times 10^{-10} \text{ m}^2 \text{ s}^{-1}$        | 0.000(0.006)             | -0.020(-0.022)        | 0.002(0.003)          |
| $D_{\text{co2\_PD}}$   | $1.7(1.36) \times 10^{-9} \text{ m}^2 \text{ s}^{-1}$         | <b>-0.045(-0.040)</b>    | <b>-0.047(-0.043)</b> | <b>-0.042(-0.039)</b> |
| $P_{\text{co2\_Bchl}}$ | 20(16) $\mu\text{m s}^{-1}$                                   | -0.023(-0.024)           | -0.004(-0.005)        | -0.020(-0.022)        |
| $\Phi$                 | 0.03(0.024)                                                   | <b>-0.045(-0.028)</b>    | -0.028(-0.019)        | <b>-0.040(-0.037)</b> |
| $L_{\text{pd}}$        | 400(320) nm                                                   | <b>0.044(0.065)</b>      | 0.028(0.034)          | <b>0.040(0.043)</b>   |

## 2.2 Table S2

**Table S2 Comparison of the impacts of using C3 and C4 homologs of enzymes related to C4 photosynthesis on A and nitrogen demand.** Kinetic parameters for C3 and C4 homologs were used as inputs to the model to predict the CO<sub>2</sub> uptake rate under low and high CO<sub>2</sub> conditions. The CO<sub>2</sub> uptake ratio is ratio of CO<sub>2</sub> uptake rates predicted using kinetic parameters of a C3 homolog to that using a C4 homolog. Nitrogen cost for the synthesis of an enzyme was calculated based on the turnover number, molecular weight and the maximal rate of the enzyme. The nitrogen cost ratio was defined as the ratio of nitrogen required for synthesis of a C3 homolog to that for a C4 version.

| <b>PEPC (4.1.1.31)</b>                                                                     |                     | <b>C<sub>4</sub> homolog</b>     | <b>C<sub>3</sub> homolog</b>         | <b>A Ratio (C<sub>3</sub>/C<sub>4</sub>)</b>             |                           |
|--------------------------------------------------------------------------------------------|---------------------|----------------------------------|--------------------------------------|----------------------------------------------------------|---------------------------|
| <b>Functional Parameters</b><br><br>$V_{\max}=170$<br>$\mu\text{mol m}^{-2} \text{s}^{-1}$ | $K_{m\text{PEP}}$   | 1mM<br>(Uedan, 1976)             | 0.069mM<br>(De Nisi, 2000)           | <b>C<sub>i</sub>=5 Pa</b>                                | <b>C<sub>i</sub>=15Pa</b> |
|                                                                                            | $K_{m\text{HCO}_3}$ | 0.02mM<br>(Uedan, 1976)          | 0.24mM<br>(De Nisi, 2000)            | <b>0.345</b>                                             | <b>0.505</b>              |
|                                                                                            | $k_{\text{cat}}$    | 66 s <sup>-1</sup><br>(Xu, 2006) | 69s <sup>-1</sup><br>(Koizumi, 1996) | <b>Nitrogen Cost Ratio (C<sub>3</sub>/C<sub>4</sub>)</b> |                           |
|                                                                                            | MW                  | 96000<br>(Harpster, 1986)        | 110000<br>(Koizumi, 1996)            | <b>1.10</b>                                              |                           |

| <b>NADP-MDH (1.1.1.82)</b>                                                                |                     | <b>C<sub>4</sub> homolog</b>          | <b>C<sub>3</sub> homolog</b>               | <b>A Ratio (C<sub>3</sub>/C<sub>4</sub>)</b>             |                           |
|-------------------------------------------------------------------------------------------|---------------------|---------------------------------------|--------------------------------------------|----------------------------------------------------------|---------------------------|
| <b>Functional Parameters</b><br><br>$V_{\max}=90$<br>$\mu\text{mol m}^{-2} \text{s}^{-1}$ | $K_{m\text{NADPH}}$ | 0.024mM<br>(Kagawa, 1988)             | 0.039 mM<br>(Fickenscher, 1983)            | <b>C<sub>i</sub>=5 Pa</b>                                | <b>C<sub>i</sub>=15Pa</b> |
|                                                                                           | $K_{m\text{OAA}}$   | 0.056mM<br>(Kagawa, 1988)             | 0.048 mM<br>(Fickenscher, 1983)            | <b>1</b>                                                 | <b>1</b>                  |
|                                                                                           | $K_{m\text{NADP}}$  | 0.073mM<br>(Kagawa, 1988)             | 0.063 mM<br>(Fickenscher, 1983)            |                                                          |                           |
|                                                                                           | $K_{m\text{MAL}}$   | 32mM<br>(Kagawa, 1988)                | 0.0145mM<br>(Fickenscher, 1983)            |                                                          |                           |
|                                                                                           | $k_{\text{cat}}$    | 677 s <sup>-1</sup><br>(Kagawa, 1988) | 118 s <sup>-1</sup><br>(Fickenscher, 1983) | <b>Nitrogen Cost Ratio (C<sub>3</sub>/C<sub>4</sub>)</b> |                           |
|                                                                                           | MW                  | 43000<br>(Agostino, 1992)             | 38500<br>(Fickenscher, 1983)               | <b>5.14</b>                                              |                           |

| <b>Rubisco (4.1.1.39)</b>                                                                 |                    | <b>C<sub>4</sub> homolog</b>            | <b>C<sub>3</sub> homolog</b>            | <b>A Ratio (C<sub>3</sub>/C<sub>4</sub>)</b>             |                   |
|-------------------------------------------------------------------------------------------|--------------------|-----------------------------------------|-----------------------------------------|----------------------------------------------------------|-------------------|
| <b>Functional Parameters</b><br><br>$V_{\max}=65$<br>$\mu\text{mol m}^{-2} \text{s}^{-1}$ | $K_{m\text{CO}_2}$ | 0.0162mM<br>(Cousins, 2010)             | 0.0097mM<br>(Cousins, 2010)             | $C_i=5 \text{ Pa}$                                       | $C_i=15\text{Pa}$ |
|                                                                                           | $K_{m\text{O}_2}$  | 0.183mM<br>(Cousins, 2010)              | 0.244mM<br>(Cousins, 2010)              | <b>1.033</b>                                             | <b>1.026</b>      |
|                                                                                           | $k_{\text{cat}}$   | $4.7 \text{ s}^{-1}$<br>(Cousins, 2010) | $3.8 \text{ s}^{-1}$<br>(Cousins, 2010) | <b>Nitrogen Cost Ratio (C<sub>3</sub>/C<sub>4</sub>)</b> |                   |
|                                                                                           | MW                 | 70000<br>(Spreitzer, 1999)              | 70000<br>(Spreitzer, 1999)              | <b>1.24</b>                                              |                   |

| <b>NADP-ME (1.1.1.40)</b>                                                                  |                     | <b>C<sub>4</sub> homolog</b>              | <b>C<sub>3</sub> homologs</b>                                                                                                                                                                                                                    | <b>A Ratio (C<sub>3</sub>/C<sub>4</sub>)</b>                                                                         |                                                            |
|--------------------------------------------------------------------------------------------|---------------------|-------------------------------------------|--------------------------------------------------------------------------------------------------------------------------------------------------------------------------------------------------------------------------------------------------|----------------------------------------------------------------------------------------------------------------------|------------------------------------------------------------|
| <b>Functional Parameter s</b><br><br>$V_{\max}=90$<br>$\mu\text{mol m}^{-2} \text{s}^{-1}$ | $K_{m\text{MAL}}$   | 0.23 mM<br>(Detarsio, 2004)               | 2.96 mM <sub>ME1</sub> (Wheeler, 2008)<br>3.33 mM <sub>ME2</sub> (Wheeler, 2008)<br>0.83 mM <sub>ME3</sub> (Wheeler, 2008)<br><b>0.23 mM<sub>ME4</sub></b> (Wheeler, 2008)                                                                       | $C_i=5 \text{ Pa}$                                                                                                   | $C_i=15\text{Pa}$                                          |
|                                                                                            | $K_{m\text{NADPH}}$ | 0.045mM<br>Ziegler (1974)                 | 0.205 mM <sub>ME1</sub> (Wheeler, 2008)<br>0.0721mM <sub>ME2</sub> (Wheeler, 2008)<br>0.0065mM <sub>ME3</sub> (Wheeler, 2008)<br><b>0.0102mM<sub>ME4</sub></b> (Wheeler, 2008)                                                                   | <b>0.926<sub>ME1}</sub></b><br><b>0.915<sub>ME2}</sub></b>                                                           | <b>0.956<sub>ME1}</sub></b><br><b>0.936<sub>ME2}</sub></b> |
|                                                                                            | $K_{m\text{pyr}}$   | 3mM<br>(Ziegler, 1974)                    | 16.9 mM <sub>ME1</sub> (Wheeler, 2008)<br>138.9 mM <sub>ME2</sub> (Wheeler, 2008)<br>48.2 mM <sub>ME3</sub> (Wheeler, 2008)<br><b>26.3 mM<sub>ME4</sub></b> (Wheeler, 2008)                                                                      | <b>0.975<sub>ME3}</sub></b><br><b>0.999<sub>ME4}</sub></b>                                                           | <b>0.979<sub>ME3}</sub></b><br><b>0.998<sub>ME4}</sub></b> |
|                                                                                            | $k_{\text{cat}}$    | $201.3 \text{ s}^{-1}$<br>(Detarsio,2003) | $38.7 \text{ s}^{-1}$ <sub>ME1</sub> (Wheeler, 2008)<br>$324.1 \text{ s}^{-1}$ <sub>ME2</sub> (Wheeler, 2008)<br>$268.1 \text{ s}^{-1}$ <sub>ME3</sub> (Wheeler, 2008)<br><b><math>151.3 \text{ s}^{-1}</math><sub>ME4</sub></b> (Wheeler, 2008) | <b>Nitrogen Cost Ratio (C<sub>3</sub>/C<sub>4</sub>)</b>                                                             |                                                            |
|                                                                                            | MW                  | 62000<br>(Detarsio, 2004)                 | 65000 (Wheeler, 2008)                                                                                                                                                                                                                            | <b>5.45<sub>ME1}</sub></b><br><b>0.65<sub>ME2}</sub></b><br><b>0.79<sub>ME3}</sub></b><br><b>1.39<sub>ME4}</sub></b> |                                                            |

| <b>PPDK (2.7.9.1)</b>                                                                      |                   | <b>C<sub>4</sub> homolog</b>           | <b>C<sub>3</sub> homolog</b>             | <b>A Ratio (C<sub>3</sub>/C<sub>4</sub>)</b>             |                     |
|--------------------------------------------------------------------------------------------|-------------------|----------------------------------------|------------------------------------------|----------------------------------------------------------|---------------------|
| <b>Functional Parameter s</b><br><br>$V_{\max}=90$<br>$\mu\text{mol m}^{-2} \text{s}^{-1}$ | $K_{m\text{ATP}}$ | 0.082mM<br>(Jenkins, 1985)             | 0.036mM<br>(Meyer, 1978)                 | $C_i=5 \text{ Pa}$                                       | $C_i=15 \text{ Pa}$ |
|                                                                                            | $K_{m\text{PYR}}$ | 0.082mM<br>Jenkins, 1985               | 0.025mM<br>(Meyer, 1978)                 | <b>1</b>                                                 | <b>1</b>            |
|                                                                                            | $k_{\text{cat}}$  | $6.02 \text{ s}^{-1}$<br>McGuire, 1996 | $7.33 \text{ s}^{-1}$<br>(McGuire, 1996) | <b>Nitrogen Cost Ratio (C<sub>3</sub>/C<sub>4</sub>)</b> |                     |
|                                                                                            | MW                | 95000<br>Chastain, 2000                | 96600<br>(Moons, 1998)                   | <b>1.20</b>                                              |                     |

### 3. List of Abbreviations and Their Definitions

#### 3.1 Metabolites

| Abbreviation     | Full Name                                                                     | Units |
|------------------|-------------------------------------------------------------------------------|-------|
| ADPG             | ADP-glucose                                                                   | mM    |
| CO <sub>2</sub>  | Carbon dioxide                                                                | mM    |
| CA               | Total adenylate nucleotide in the chloroplast stroma<br>including ATP and ADP | mM    |
| CN               | Total of NADP <sup>+</sup> and NADPH in chloroplast stroma                    | mM    |
| CP               | The total concentration of phosphate in chloroplast stroma                    | mM    |
| DHAP             | Dihydroxyacetone-phosphate                                                    | mM    |
| DPGA             | 1,3-bisphosphoglycerate                                                       | mM    |
| E4P              | Erythrose 4-phosphate                                                         | mM    |
| F26BP            | Fructose 2,6-bisphosphate                                                     | mM    |
| F6P              | Fructose 6-phosphate                                                          | mM    |
| FBP              | Fructose 1,6-bisphosphate                                                     | mM    |
| G1P              | Glucose 1-phosphate                                                           | mM    |
| G6P              | Glucose 6-phosphate                                                           | mM    |
| GAP              | Glyceraldehyde 3-phosphate                                                    | mM    |
| GCA              | Glycollate                                                                    | mM    |
| GCEA             | Glycerate                                                                     | mM    |
| GLU              | Glutamate                                                                     | mM    |
| GLY              | Glycine                                                                       | mM    |
| GOA              | Glyoxylate                                                                    | mM    |
| HCO <sub>3</sub> | Bicarbonate                                                                   | mM    |
| HexP             | Hexose phosphate, includes F6P, G6P, and G1P                                  | mM    |
| HPR              | Hydroxypyruvate                                                               | mM    |
| KG               | Ketoglutarate                                                                 | mM    |
| Mal              | Malate                                                                        | mM    |

|                |                                              |    |
|----------------|----------------------------------------------|----|
| O <sub>2</sub> | Oxygen                                       | mM |
| OAA            | Oxaloacetate                                 | mM |
| PEP            | phosphoenolpyruvate                          | mM |
| PenP           | Pentose phosphate including Ri5P, Ru5P, Xu5P | mM |
| PGA            | 3-Phosphoglycerate                           | mM |
| PGCA           | 3-Phosphoglycollate                          | mM |
| Pi             | phosphate                                    | mM |
| PPi            | Pyrophosphate                                | mM |
| PYR            | Pyruvate                                     | mM |
| Ri5P           | Ribose 5-phosphate                           | mM |
| Ru5P           | Ribulose 5-phosphate                         | mM |
| RuBP           | Ribulose 1,5-biphosphate                     | mM |
| S7P            | Sedoheptulose 7-phosphate                    | mM |
| SBP            | Sedoheptulose 1,7-bisphosphate               | mM |
| SER            | Serine                                       | mM |
| SUC            | Sucrose                                      | mM |
| SUCP           | Sucrose phosphate                            | mM |
| T3P            | Triose phosphate including DHAP and GAP      | mM |
| UDP            | Uridine Diphosphate                          | mM |
| UDPG           | Uridine Diphosphate Glucose                  | mM |
| UTP            | Uridine Triphosphate                         | mM |
| Xu5P           | Xylulose 5-phosphate                         | mM |

---

### 3.2 Enzymes and Numbering

| EC (or Model Defined ) | Abbreviation  | Full Name                         | Numbering in the Model |
|------------------------|---------------|-----------------------------------|------------------------|
| 4.2.1.1                | CA            | Carbonic anhydrase                | 1                      |
| 4.1.1.31               | PEPC          | Phosphoenolpyruvate carboxylase   | 2                      |
| 2.7.9.1                | PPDK          | Pyruvate, phosphate dikinase      | 5                      |
| 1.1.1.82               | MDH           | Malate dehydrogenase (NADP+)      | 3                      |
| 1.1.1.40               | ME            | NADP-Malic enzyme                 | 4                      |
| 4.1.1.39               | Rubisco       | Ribulose-bisphosphate carboxylase | 6                      |
|                        |               |                                   | Pr1                    |
| 2.7.2.3                | PGAK          | Phosphoglycerate kinase           | 7                      |
| 2.7.2.3M               |               |                                   | 7Mchl                  |
| 1.2.1.13               | GAPDH         | Glyceraldehyde-3-phosphate        | 8                      |
| 1.2.1.13M              |               | dehydrogenase (NADP+)             | 8Mchl                  |
| 5.3.1.1                | T3PI          | Triose-phosphate isomerase        | 9                      |
| 4.1.2.13F              | Aldolase      | Fructose-bisphosphate aldolase    | 10                     |
| 4.1.2.13S              |               |                                   | 12                     |
| 4.1.2.13M              |               |                                   | Suc1                   |
| 3.1.3.37               | SBPase        | Sedoheptulose-bisphosphatase      | 13                     |
| 3.1.3.11               | FBPase        | Fructose-bisphosphatase           | 11                     |
| 3.1.3.11M              |               |                                   | Suc2                   |
| 2.2.1.1X               | Transketolase | Transketolase                     | 14                     |
| 2.2.1.1R               |               |                                   | 15                     |
| 5.3.1.6                | Ri5PI         | Ribose-5-phosphate isomerase      | 16                     |
| 5.1.3.1                | Ru5PE         | Ribulose-phosphate 3-epimerase    | 17                     |
| 2.7.1.19               | PRK           | Phosphoribulokinase               | 18                     |
| 5.3.1.9                | G6PI          | Glucose-6-phosphate isomerase     | Sta1                   |
| 5.3.1.9M               |               |                                   | Suc5                   |
| 5.4.2.2                | PGM           | Phosphoglucomutase                | Sta2                   |

|                    |                 |                                                                 |         |
|--------------------|-----------------|-----------------------------------------------------------------|---------|
| 5.4.2.2M           |                 |                                                                 | Suc6    |
| 2.7.7.27           | GPA             | Glucose-1-phosphate<br>adenylyltransferase                      | Sta3    |
| 3.6.1.1            | Diphosphatase   | inorganic diphosphatase                                         | Sta4    |
| 2.4.1.21           | Starch synthase | Starch synthase                                                 | Sta5    |
| 2.7.1.105M         | PFK             | 6-phosphofructo-2-kinase                                        | Suc3    |
| 3.1.3.46M          | F26BPP          | Fructose-2,6-bisphosphate<br>2-phosphatase                      | Suc4    |
| 2.7.7.9M           | UGPU            | UTP-glucose-1-phosphate<br>uridylyltransferase                  | Suc7    |
| 2.4.1.14M          | SPS             | Sucrose-phosphate synthase                                      | Suc8    |
| 3.1.3.24M          | SPP             | Sucrose-phosphate phosphatase                                   | Suc9    |
| 3.1.3.18           | PGCAP           | Phosphoglycolate phosphatase                                    | Pr2     |
| 1.1.3.15           | GO              | (S)-2-hydroxy-acid oxidase &<br>Catalase(CAT, EC1.11.1.6)       | Pr3     |
| 2.6.1.4            | GGAT            | Glycine transaminase                                            | Pr4     |
| 2.6.1.45           | SGAT            | Serine-glyoxylate transaminase                                  | Pr6     |
| 1.1.1.29           | HPR             | Glycerate dehydrogenase                                         | Pr7     |
| 2.7.1.31           | GLYK            | Glycerate kinase                                                | Pr8     |
| 3.6.1.14M          | ATPase          | ATP synthase                                                    | ATPM    |
| 3.6.1.14B          |                 |                                                                 | ATPB    |
| 1.18.1.2M          | FNR             | Ferredoxin-NADP+ reductase                                      | NADPHM  |
| PGASink            | PGASink         | PGA used for amino acid synthesis or<br>other metabolic pathway | PGASink |
| Mutase&<br>Enolase | Ex              | 5.4.2.1&4.2.1.11                                                | Ex      |
| Gly_ser            | Gly_Ser         | EC 1.4.4.2&EC2.1.2.1                                            | Pr5     |
| StarchDag          | StarchDag       | Starch degradation                                              | StaDag  |



### 3.3 Metabolite Transport Process Through Chloroplast Membrane

| Model Defined    | Abbreviation | Full Name                                                                              |
|------------------|--------------|----------------------------------------------------------------------------------------|
| <b>Numbering</b> |              |                                                                                        |
| $T_{PGAM}$       | TPT M        | Triose phosphate translocator in mesophyll cell, which can transport PGA DHAP and GAP. |
| $T_{DHAPM}$      |              |                                                                                        |
| $T_{GAPM}$       |              |                                                                                        |
| $T_{PGAM}$       | TPT B        | Triose phosphate translocator in bundle sheath cell                                    |
| $T_{DHAPM}$      |              |                                                                                        |
| $T_{GAPM}$       |              |                                                                                        |
| $T_{OAAM}$       | DiT1         | Dicarboxylate transporter                                                              |
| $T_{MALM}$       |              |                                                                                        |
| $T_{MALB}$       | DiT2         |                                                                                        |
| $T_{PEPM}$       | PPT          | PEP/phosphate translocator                                                             |
| $T_{PYRM}$       | MEPM         | proton:pyruvate cotransporter                                                          |

## 4 Equations

### 4.1 Rate Equations

#### 4.1.1 CO<sub>2</sub> diffusion from air space to mesophyll cell.

$$v_{inf} = g_m \cdot \frac{1}{S_c} \cdot 10^{-3} \cdot (C_i - [CO_2]_{MC})$$

#### 4.1.2 C4 cycle reactions

$$v_1 = \frac{V_{m-1} \left( [CO_2]_{MC} - \frac{[HCO_3^-]_{MC} \cdot [H^+]_{MC}}{k_{e-1}} \right)}{K_{mCO_2-1} \cdot \left( 1 + \frac{[CO_2]_{MC}}{K_{mCO_2-1}} + \frac{[HCO_3^-]_{MC}}{K_{mHCO_3-1}} \right)}$$

$$v_2 = \frac{V_{m\_2} [HCO_3^-]_{MC} \cdot [PEP]_{MC}}{\left([PEP]_{MC} + K'_{mPEP\_2}\right) \left([HCO_3^-]_{MC} + K_{mHCO_3\_2}\right)}$$

$$K'_{mPEP\_2} = \frac{K_{mPEP\_2} \left(1 + \frac{[MAL]_{MC}}{K_{iMAL\_2}}\right)}{\left(1 + \frac{[G6P]_{MC}}{K_{aG6P\_2}} + \frac{[T3P]_{MC}}{K_{aT3P\_2}}\right)}$$

$$v_3 = \frac{V_{m\_3} \left( [OAA]_{Mchl} \cdot [NADPH]_{Mchl} - \frac{[NADP]_{Mchl} \cdot [MAL]_{Mchl}}{k_{e\_3}} \right)}{K_{mOAA\_3} K_{mNADPH\_3} \alpha_3}$$

$$\alpha_3 = 1 + \frac{[OAA]_{Mchl}}{K_{mOAA\_3}} + \frac{[NADPH]_{Mchl}}{K_{mNADPH\_3}} + \frac{[NADP]_{Mchl}}{K_{mNADP\_3}} + \frac{[MAL]_{Mchl}}{K_{mMAL\_3}} + \frac{[OAA]_{Mchl} \cdot [NADPH]_{Mchl}}{K_{mOAA\_3} K_{mNADPH\_3}} + \frac{[NADP]_{Mchl} \cdot [MAL]_{Mchl}}{K_{mNADP\_3} K_{mMAL\_3}}$$

$$v_4 = \frac{V_{m\_4} \left( [MAL]_{Bchl} \cdot [NADP]_{Bchl} - \frac{[PYR]_{Bchl} \cdot [NADPH]_{Bchl} \cdot [CO_2]_{Bchl}}{k_{e\_4}} \right)}{K_{mMAL\_4} K_{mNADP\_4} \alpha_4}$$

$$\alpha_4 = 1 + \frac{[MAL]_{Bchl}}{K_{mMAL\_4}} + \frac{[NADP]_{Bchl}}{K_{mNADP\_4}} + \frac{[PYR]_{Bchl}}{K_{mPYR\_4}} + \frac{[NADPH]_{Bchl}}{K_{mNADPH\_4}} + \frac{[CO_2]_{Bchl}}{K_{mCO_2\_4}} + \frac{[MAL]_{Bchl} \cdot [NADP]_{Bchl}}{K_{mMAL\_4} K_{mNADP\_4}} + \frac{[PYR]_{Bchl} \cdot [NADPH]_{Bchl}}{K_{mPYR\_4} K_{mNADPH\_4}} + \frac{[PYR]_{Bchl} \cdot [CO_2]_{Bchl}}{K_{mPYR\_4} K_{mCO_2\_4}} + \frac{[CO_2]_{Bchl} \cdot [NADPH]_{Bchl}}{K_{mCO_2\_4} K_{mNADPH\_4}} + \frac{[PYR]_{Bchl} \cdot [NADPH]_{Bchl} \cdot [CO_2]_{Bchl}}{K_{mPYR\_4} K_{mNADPH\_4} K_{mCO_2\_4}}$$

$$v_5 = \frac{V_{m\_5} [PYR]_{Mchl} \cdot [ATP]_{Mchl}}{\left([PYR]_{Mchl} + K_{mPYR\_5} \cdot \left(1 + \frac{[PEP]_{Mchl}}{K_{iPEP\_5}}\right)\right) \left([ATP]_{Mchl} + K_{mATP\_5}\right)}$$

### 4.1.3 Calvin Cycle reactions

$$v_6 = \frac{V_{m\_6} \min \left( 1, \frac{[RuBP]_{Bchl}}{[Rubisco]_{Bchl}} \right) \cdot [RuBP]_{Bchl} \cdot [CO_2]_{Bchl}}{\left( [CO_2]_{Bchl} + K'_{mCO_2\_6} \right) \left( [RuBP]_{Bchl} + K'_{mRuBP\_6} \right)}$$

$$K'_{mCO_2\_6} = K_{mCO_2\_6} \left( 1 + \frac{[O_2]_{Bchl}}{K_{iO_2\_6}} \right)$$

$$K'_{mRuBP\_6} = K_{mRuBP\_6} \left( 1 + \frac{[PGA]_{Bchl}}{K_{iPGA\_6}} + \frac{[FBP]_{Bchl}}{K_{iFBP\_6}} + \frac{[SBP]_{Bchl}}{K_{iSBP\_6}} + \frac{[Pi]_{Bchl}}{K_{iPi\_6}} + \frac{[NADPH]_{Bchl}}{K_{iNADPH\_6}} \right)$$

$$v_7 = \frac{V_{m\_7} [PGA]_{Bchl} \cdot [ATP]_{Bchl}}{\left( [PGA]_{Bchl} + K_{mPGA\_7} \right) \left( [ATP]_{Bchl} + K_{mATP\_7} \cdot \left( 1 + \frac{[ADP]_{Bchl}}{K_{iADP\_7}} \right) \right)}$$

$$v_8 = \frac{V_{m\_8} [DPGA]_{Bchl} \cdot [NADPH]_{Bchl}}{\left( [DPGA]_{Bchl} + K_{mPGA\_8} \right) \left( [NADPH]_{Bchl} + K_{mNADPH\_8} \right)}$$

$$v_{10} = \frac{V_{m\_10} \left( [GAP]_{Bchl} \cdot [DHAP]_{Bchl} - \frac{[FBP]_{Bchl}}{k_{e\_10}} \right)}{K_{mGAP\_10} K_{mDHAP\_10} \alpha_{10}}$$

$$\alpha_{10} = 1 + \frac{[GAP]_{Bchl}}{K_{mGAP\_10}} + \frac{[DHAP]_{Bchl}}{K_{mDHAP\_10}} + \frac{[FBP]_{Bchl}}{K_{mFBP\_10}} + \frac{[GAP]_{Bchl} \cdot [DHAP]_{Bchl}}{K_{mGAP\_10} K_{mDHAP\_10}}$$

$$v_{11} = \frac{V_{m\_11} \left( [FBP]_{Bchl} - \frac{[F6P]_{Bchl} \cdot [Pi]_{Bchl}}{k_{e\_11}} \right)}{\left( [FBP]_{Bchl} + K_{mFBP\_11} \cdot \left( 1 + \frac{[F6P]_{Bchl}}{K_{iF6P\_11}} + \frac{[Pi]_{Bchl}}{K_{iPi\_11}} \right) \right)}$$

$$v_{12} = \frac{V_{m\_12} \left( [DHAP]_{Bchl} \cdot [E4P]_{Bchl} - \frac{[SBP]_{Bchl}}{k_{e\_12}} \right)}{\left( [DHAP]_{Bchl} + K_{mDHAP\_12} \right) \left( [E4P]_{Bchl} + K_{mE4P\_12} \right)}$$

$$v_{13} = \frac{V_{m_{13}} \left( [SBP]_{Bchl} - \frac{[Pi]_{Bchl} \cdot [S7P]_{Bchl}}{k_{e_{13}}} \right)}{\left( [SBP]_{Bchl} + K_{mSBP_{13}} \cdot \left( 1 + \frac{[Pi]_{Bchl}}{K_{iPi_{13}}} \right) \right)}$$

$$v_{14} = \frac{V_{m_{14}} \left( [F6P]_{Bchl} \cdot [GAP]_{Bchl} - \frac{[Xu5P]_{Bchl} \cdot [E4P]_{Bchl}}{k_{e_{14}}} \right)}{\left( [F6P]_{Bchl} + K'_{mF6P_{14}} \right) \left( [GAP]_{Bchl} + K_{mGAP_{14}} \right)}$$

$$K'_{mF6P_{14}} = K_{mF6P_{14}} \left( 1 + \frac{[Xu5P]_{Bchl}}{K_{iXu5P_{14}}} + \frac{[E4P]_{Bchl}}{K_{iE4P_{14}}} \right)$$

$$v_{15} = \frac{V_{m_{15}} \left( [GAP]_{Bchl} \cdot [S7P]_{Bchl} - \frac{[Ri5P]_{Bchl} \cdot [Xu5P]_{Bchl}}{k_{e_{15}}} \right)}{\left( [GAP]_{Bchl} + K'_{mGAP_{15}} \right) \left( [S7P]_{Bchl} + K_{mS7P_{15}} \right)}$$

$$K'_{mGAP_{15}} = K_{mGAP_{15}} \left( 1 + \frac{[Xu5P]_{Bchl}}{K_{iXu5P_{14}}} + \frac{[Ri5P]_{Bchl}}{K_{iRi5P_{15}}} \right)$$

$$v_{18} = \frac{V_{m_{18}} \left( [ATP]_{Bchl} \cdot [Ru5P]_{Bchl} - \frac{[ADP]_{Bchl} \cdot [RuBP]_{Bchl}}{k_{e_{18}}} \right)}{\left( [ATP]_{Bchl} + K'_{mATP_{18}} \right) \left( [Ru5P]_{Bchl} + K'_{mRu5P_{18}} \right)}$$

$$K'_{mATP_{18}} = K_{mATP_{18}} \left( 1 + \frac{[ADP]_{Bchl}}{K_{iADP_{18}}} \right)$$

$$K'_{mRu5P_{18}} = K_{mRu5P_{18}} \left( 1 + \frac{[PGA]_{Bchl}}{K_{iPGA_{18}}} + \frac{[RuBP]_{Bchl}}{K_{iRuBP_{18}}} + \frac{[Pi]_{Bchl}}{K_{iPi_{18}}} \right)$$

$$v_{7M} = \frac{V_{m_{7M}} \left( [PGA]_{Mchl} \cdot [ATP]_{Mchl} \right)}{\left( [PGA]_{Mchl} + K_{mPGA_{7M}} \right) \left( [ATP]_{Mchl} + K_{mATP_{7M}} \cdot \left( 1 + \frac{[ADP]_{Mchl}}{K_{iADP_{7M}}} \right) \right)}$$

$$v_{8M} = \frac{V_{m_{8M}} \left( [DPGA]_{Mchl} \cdot [NADPH]_{Mchl} \right)}{\left( [DPGA]_{Mchl} + K_{mPGA_{8M}} \right) \left( [NADPH]_{Mchl} + K_{mNADPH_{8M}} \right)}$$

#### 4.1.4 Starch synthesis reactions

$$V_{m\_Sta3} = \frac{V'_{m\_Sta3} \cdot \left( [G1P]_{Bchl} \cdot [ATP]_{Bchl} - \frac{[ADPG]_{Bchl} \cdot [PPi]_{Bchl}}{K_{e\_Sta3}} \right)}{K_{mG1P\_Sta3} \cdot K'_{mATP\_Sta3} \cdot \alpha_{Sta3}}$$

$$V'_{m\_Sta3} = V_{m\_Sta3} \cdot \frac{[PGA]_{Bchl}}{([PGA]_{Bchl} + K_{aPGA\_Sta3})}$$

$$K'_{mATP\_Sta3} = K_{mATP\_Sta3} \cdot \left( 1 + \frac{[ADP]_{Bchl}}{K_{iAADP\_ATP\_Sta3}} + \frac{[PPi]_{Bchl}}{K_{iCPPi\_ATP\_Sta3}} + \frac{[Pi]_{Bchl}}{K_{iAPi\_ATP\_Sta3}} \right)$$

$$\alpha_{Sta3} = 1 + \frac{[G1P]_{Bchl}}{K_{mG1P\_Sta3}} + \frac{[ATP]_{Bchl}}{K'_{mATP\_Sta3}} + \frac{[ADPG]_{Bchl}}{K_{mADPG\_Sta3}} + \frac{[PPi]_{Bchl}}{K_{mPP1\_Sta3}} + \frac{[G1P]_{Bchl} \cdot [ATP]_{Bchl}}{(K_{mG1P\_Sta3} \cdot K'_{mATP\_Sta3})} + \frac{[ADPG]_{Bchl} \cdot [PPi]_{Bchl}}{(K_{mADPG\_Sta3} \cdot K_{mPP1\_Sta3})}$$

$$V_{Sta4} = \frac{V_{m\_Sta4} \cdot \left( [PPi]_{Bchl} - \frac{[PPi]_{Bchl}^2}{K_{e\_Sta4}} \right)}{[PPi]_{Bchl} + K_{mPPi\_Sta4}}$$

$$V_{Sta5} = \frac{V_{m\_Sta5} \cdot [ADPG]_{Bchl}}{([ADPG]_{Bchl} + K_{mADPG\_Sta5})}$$

#### 4.1.5 Sucrose synthesis reactions

$$V_{Suc1} = \frac{V_{m\_Suc1} \cdot \left( [GAP]_{MC} \cdot [DHAP]_{MC} - \frac{[FBP]_{MC}}{k_{e\_Suc1}} \right)}{K_{mGAP\_Suc1} \cdot K_{mDHAP\_Suc1} \cdot \alpha_{Suc1}}$$

$$\alpha_{Suc1} = 1 + \frac{[GAP]_{MC}}{K_{mGAP\_Suc1}} + \frac{[DHAP]_{MC}}{K_{mDHAP\_Suc1}} + \frac{[FBP]_{MC}}{K_{mFBP\_Suc1}} + \frac{[GAP]_{MC} \cdot [DHAP]_{MC}}{K_{mGAP\_Suc1} \cdot K_{mDHAP\_Suc1}}$$

$$v_{Suc2} = \frac{V_{m\_Suc2} \left( [FBP]_{MC} - \frac{[F6P]_{MC} \cdot [Pi]_{MC}}{k_{e\_Suc2}} \right)}{K'_{mFBP\_Suc2} \alpha_{Suc2}}$$

$$\alpha_{Suc2} = 1 + \frac{[FBP]_{MC}}{K'_{mFBP\_Suc2}} + \frac{[F6P]_{MC}}{K_{mF6P\_Suc2}} + \frac{[Pi]_{MC}}{K_{mPi\_Suc2}} + \frac{[F6P]_{MC} \cdot [Pi]_{MC}}{K_{mF6P\_Suc2} K_{mPi\_Suc2}}$$

$$K'_{mFBP\_Suc2} = K_{mFBP\_Suc2} \left( 1 + \frac{[F26BP]_{MC}}{K_{iF26BP\_Suc2}} \right)$$

$$v_{Suc3} = \frac{V_{m\_Suc3} \left( [ATP]_{MC} \cdot [F6P]_{MC} - \frac{[ADP]_{MC} \cdot [F26BP]_{MC}}{k_{e\_Suc3}} \right)}{([ATP]_{MC} + K'_{mATP\_Suc3}) ([F6P]_{MC} + K'_{mF6P\_Suc3})}$$

$$K'_{mATP\_Suc3} = K_{mATP\_Suc3} \left( 1 + \frac{[ADP]_{MC}}{K_{iADP\_Suc3}} \right)$$

$$K'_{mF6P\_Suc3} = K_{mF6P\_Suc3} \left( 1 + \frac{[F26BP]_{MC}}{K_{iF26BP\_Suc3}} \right) \cdot \left( 1 + \frac{[DHAP]_{MC}}{K_{iDHAP\_Suc3}} \right)$$

$$v_{Suc4} = \frac{V_{m\_Suc4} [F26BP]_{MC}}{K_{mF26BP\_Suc4} \left( 1 + \frac{[F26BP]_{MC}}{K_{mF26BP\_Suc4}} \right) \left( 1 + \frac{[Pi]_{MC}}{K_{mPi\_Suc4}} \right) \left( 1 + \frac{[F6P]_{MC}}{K_{mF6P\_Suc4}} \right)}$$

$$v_{Suc7} = \frac{V_{m\_Suc7} \left( [UTP]_{MC} \cdot [G1P]_{MC} - \frac{[UDPG]_{MC} \cdot [PPi]_{MC}}{k_{e\_Suc7}} \right)}{K_{mUTP\_Suc7} K_{mG1P\_Suc7} \alpha_{Suc7}}$$

$$\alpha_{Suc7} = 1 + \frac{[UTP]_{MC}}{K_{mUTP\_Suc7}} + \frac{[G1P]_{MC}}{K_{mG1P\_Suc7}} + \frac{[UDPG]_{MC}}{K_{mUDPG\_Suc7}} + \frac{[PPi]_{MC}}{K_{mPPi\_Suc7}} +$$

$$+ \frac{[UTP]_{MC} \cdot [G1P]_{MC}}{K_{mUTP\_Suc2} K_{mG1P\_Suc2}} + \frac{[UDPG]_{MC} \cdot [PPi]_{MC}}{K_{mUDPG\_Suc2} K_{mPPi\_Suc2}}$$

$$v_{Suc8} = \frac{V_{m\_Suc8} \left( [F6P]_{MC} \cdot [UDPG]_{MC} - \frac{[SUCP]_{MC} \cdot [UDP]_{MC}}{k_{e\_Suc8}} \right)}{\left( [F6P]_{MC} + K'_{mF6P\_Suc8} \right) \left( [UDPG]_{MC} + K'_{mUDPG\_Suc8} \right)}$$

$$K'_{mF6P\_Suc8} = K_{mF6P\_Suc8} \left( 1 + \frac{[FBP]_{MC}}{K_{iFBP\_Suc8}} \right)$$

$$K'_{mUDPG\_Suc8} = K_{mUDPG\_Suc8} \left( 1 + \frac{[UDP]_{MC}}{K_{iUDP\_Suc8}} \right) \left( 1 + \frac{[SUCP]_{MC}}{K_{iSUCP\_Suc8}} \right) \left( 1 + \frac{[SUC]_{MC}}{K_{iSUC\_Suc8}} \right) \left( 1 + \frac{[Pi]_{MC}}{K_{iPi\_Suc8}} \right)$$

$$v_{Suc9} = \frac{V_{m\_Suc9} \left( [SUCP]_{MC} - \frac{[SUC]_{MC} \cdot [Pi]_{MC}}{k_{e\_Suc9}} \right)}{[SUCP]_{MC} + K_{mSUCP\_Suc9} \cdot \left( 1 + \frac{[SUC]_{MC}}{K_{mSUC\_Suc9}} \right)}$$

$$v_{Suc10} = V_{m\_Suc10} \frac{[SUC]_{MC}}{\left( [SUC]_{MC} + K_{mSUC\_Suc10} \right)}$$

#### 4.1.6 PGA Sink reaction

$$v_{PGA_{sink}} = V_{m\_PGA_{sink}} \frac{[PGA]_{MC}}{\left( [PGA]_{MC} + K_{mPGA\_PGA_{sink}} \right)}$$

#### 4.1.7 Light reactions

$$J_m = \frac{I_m + J_{\max\_m} - \sqrt{\left( I_m + J_{\max\_m} \right)^2 - 4\theta I_m J_{\max\_m}}}{2\theta}$$

$$J_b = \frac{I_b + J_{\max\_b} - \sqrt{\left( I_b + J_{\max\_b} \right)^2 - 4\theta I_b J_{\max\_b}}}{2\theta}$$

$$I_m = X_m \cdot I \cdot \text{abs}(1-f) \cdot \frac{1}{2}$$

$$J_{\max\_m} = Y_m \cdot J_{\max}$$

$$I_b = X_b \cdot I \cdot \text{abs}(1-f)$$

$$J_{\max\_b} = Y_b \cdot J_{\max}$$

$$v_{ATPM} = \frac{\min(V_{m\_ATPM}, D \cdot J_m) \cdot \left( [ADP]_{MC} \cdot [Pi]_{MC} - \frac{[ATP]_{MC}}{k_{e\_ATPM}} \right)}{K_{mADP\_ATPM} \cdot K_{mPi\_ATPM} \cdot \alpha_{ATPM}}$$

$$\alpha_{ATPM} = 1 + \frac{[ADP]_{MC}}{K_{mADP\_ATPM}} + \frac{[Pi]_{MC}}{K_{mPi\_ATPM}} + \frac{[ATP]_{MC}}{K_{mATP\_ATPM}} + \frac{[ADP]_{MC} \cdot [Pi]_{MC}}{K_{mADP\_ATPM} \cdot K_{mPi\_ATPM}}$$

$$v_{NADPHM} = \frac{\min(V_{m\_ATPM}, E \cdot J_m) \cdot \left( [NADP]_{MC} - \frac{[NADPH]_{MC}}{k_{e\_NADPM}} \right)}{K_{mNADP\_NADPHM} \cdot \left( 1 + \frac{[NADP]_{MC}}{K_{mNADP\_NADPHM}} + \frac{[NADPH]_{MC}}{K_{mNADPH\_NADPHM}} \right)}$$

$$v_{ATPB} = \frac{\min(V_{m\_ATPB}, G \cdot J_b) \cdot \left( [ADP]_{BSC} \cdot [Pi]_{BSC} - \frac{[ATP]_{BSC}}{k_{e\_ATPB}} \right)}{K_{mADP\_ATPB} \cdot K_{mPi\_ATPB} \cdot \alpha_{ATPB}}$$

$$\alpha_{ATPB} = 1 + \frac{[ADP]_{BSC}}{K_{mADP\_ATPB}} + \frac{[Pi]_{BSC}}{K_{mPi\_ATPB}} + \frac{[ATP]_{BSC}}{K_{mATP\_ATPB}} + \frac{[ADP]_{BSC} \cdot [Pi]_{BSC}}{K_{mADP\_ATPB} \cdot K_{mPi\_ATPB}}$$

#### 4.1.8 PGA<->PEP reaction

$$v_{Ex} = \frac{V_{m\_Ex} \cdot \left( [PGA]_{MC} - \frac{[PEP]_{MC}}{k_{e\_Ex}} \right)}{K_{mPGA\_Ex} \cdot \left( 1 + \frac{[PGA]_{MC}}{K_{mPGA\_Ex}} + \frac{[PEP]_{MC}}{K_{mPEP\_Ex}} \right)}$$

#### 4.1.9 Photorespiration reactions

$$v_{Pr1} = \frac{V'_{m\_Pr1} \min \left( 1, \frac{[RuBP]_{Bchl}}{[Rubisco]_{Bchl}} \right) \cdot [RuBP]_{Bchl} \cdot [O_2]_{Bchl}}{([O_2]_{Bchl} + K'_{mO_2\_Pr1})([RuBP]_{Bchl} + K'_{mRuBP\_Pr1})}$$



$$V'_{m\_Pr1} = V_{m\_Pr1} \frac{[CO_2]_{Bchl}}{K_{ACO_2\_Pr1} + [CO_2]_{Bchl}}$$

$$K'_{mO_2\_Pr1} = K_{mO_2\_Pr1} \left(1 + \frac{[CO_2]_{Bchl}}{K_{iCO_2\_Pr1}}\right)$$

$$K'_{mRuBP\_Pr1} = K_{mRuBP\_Pr1} \left(1 + \frac{[PGA]_{Bchl}}{K_{iPGA\_Pr1}} + \frac{[FBP]_{Bchl}}{K_{iFBP\_Pr1}} + \frac{[SBP]_{Bchl}}{K_{iSBP\_Pr1}} + \frac{[Pi]_{Bchl}}{K_{iPi\_Pr1}} + \frac{[NADPH]_{Bchl}}{K_{iNADPH\_Pr1}}\right)$$

$$V_{Pr2} = \frac{V_{m\_Pr2} [PGCA]_{Bchl}}{\left([PGCA]_{Bchl} + K_{mPGCA\_Pr2} \cdot \left(1 + \frac{[GCA]_{Bchl}}{K_{iGCA\_Pr2}}\right) \left(1 + \frac{[Pi]_{Bchl}}{K_{iPi\_Pr2}}\right)\right)}$$

$$V_{Pr3} = \frac{V_{m\_Pr3} \cdot [GCA]_{Bper}}{([GCA]_{Bper} + K_{mGCA\_Pr3})}$$

$$V_{Pr4} = \frac{V_{m\_Pr4} \cdot \left([GOA]_{Bper} \cdot [GLU]_{Bper} - \frac{[KG]_{Bper} \cdot [GLY]_{Bper}}{k_{e\_Pr4}}\right)}{\left([GOA]_{Bper} + K_{mGOA\_Pr4}\right) \left([GLU]_{Bper} + K_{mGLU\_Pr4} \cdot \left(1 + \frac{[GLY]_{Bper}}{K_{iGLY\_Pr4}}\right)\right)}$$

$$V_{Pr5} = \frac{V_{m\_Pr5} \cdot [GLY]_{Bper}}{[GLY]_{Bper} + K_{mGLY\_Pr5} \cdot \left(1 + \frac{[SER]_{Bper}}{K_{iSER\_Pr5}}\right)}$$

$$V_{Pr6} = \frac{V_{m\_Pr6} \cdot \left([GOA]_{Bper} \cdot [SER]_{Bper} - \frac{[HPR]_{Bper} \cdot [GLY]_{Bper}}{k_{e\_Pr6}}\right)}{\left([GOA]_{Bper} + K_{mGOA\_Pr6}\right) \left([SER]_{Bper} + K_{mSER\_Pr6} \cdot \left(1 + \frac{[GLY]_{Bper}}{K_{iGLY\_Pr6}}\right)\right)}$$

$$V_{Pr7} = \frac{V_{m\_Pr7} \cdot \left([HPR]_{Bper} \cdot [NADH]_{Bper} - \frac{[NAD]_{Bper} \cdot [GCEA]_{Bper}}{k_{e\_Pr7}}\right)}{\left([HPR]_{Bper} + K_{mHPR\_Pr6} \cdot \left(1 + \frac{[HPR]_{Bper}}{K_{iHPR\_Pr7}}\right)\right)}$$

$$v_{Pr8} = \frac{V_{m\_Pr8} \cdot \left( [ATP]_{Bchl} \cdot [GCEA]_{Bchl} - \frac{[ADP]_{Bchl} \cdot [PGA]_{Bchl}}{k_{e\_Pr8}} \right)}{\left( [GCEA]_{Bchl} + K_{mGCEA\_Pr8} \right) \left( [ATP]_{Bchl} + K_{mATP\_Pr8} \cdot \left( 1 + \frac{[PGA]_{Bchl}}{K_{iPGA\_Pr8}} \right) \right)}$$

$$v_{Pr9} = \frac{V_{m\_Pr9} \cdot [GCA]_{Bchl}}{\left( [GCA]_{Bchl} + K_{mGCA\_Pr9} \cdot \left( 1 + \frac{[GCEA]_{Bchl}}{K_{iGCEA\_Pr9}} \right) \right)} - \frac{V_{m\_Pr9} \cdot [GCA]_{Bper}}{\left( [GCA]_{Bper} + K_{mGCA\_Pr9} \cdot \left( 1 + \frac{[GCEA]_{Bper}}{K_{iGCEA\_Pr9}} \right) \right)}$$

$$v_{Pr10} = \frac{V_{m\_Pr10} \cdot [GCEA]_{Bper}}{\left( [GCEA]_{Bper} + K_{mGCEA\_Pr10} \cdot \left( 1 + \frac{[GCA]_{Bper}}{K_{iGCA\_Pr10}} \right) \right)} - \frac{V_{m\_Pr10} \cdot [GCEA]_{Bchl}}{\left( [GCEA]_{Bchl} + K_{mGCEA\_Pr10} \cdot \left( 1 + \frac{[GCA]_{Bchl}}{K_{iGCA\_Pr10}} \right) \right)}$$

#### 4.1.10 CO2 leakage rate

$$v_{leak\_Bchl} = J_{CO_2\_Bchl} \cdot \frac{S_{chl}}{S_l} = P_{CO_2\_Bchl} \cdot \frac{S_{chl}}{S_l} \cdot ([CO_2]_{Bchl} - [CO_2]_{BSC})$$

$$v_{leak} = J_{CO_2\_PD} \cdot \frac{S_{PD}}{S_l} = \frac{D_{CO_2\_PD}}{l_{PD}} \cdot \frac{S_w \cdot \phi}{S_l} \cdot ([CO_2]_{BSC} - [CO_2]_{MC})$$

$$S_{PD} = S_w \cdot \phi$$

#### 4.1.11 Metabolite transport reactions

$$v_{TMAL} = J_{MAL\_PD} \cdot \frac{S_{PD}}{S_l} = \frac{D_{MAL\_PD}}{l_{PD}} \cdot \frac{S_w \cdot \phi}{S_l} \cdot ([MAL]_{MC} - [MAL]_{BSC})$$

$$v_{TPYR} = J_{PYR\_PD} \cdot \frac{S_{PD}}{S_l} = \frac{D_{PYR\_PD}}{l_{PD}} \cdot \frac{S_w \cdot \phi}{S_l} \cdot ([PYR]_{BSC} - [PYR]_{MC})$$

$$V_{TPGA} = J_{PGA\_PD} \cdot \frac{S_{PD}}{S_i} = \frac{D_{PGA\_PD}}{l_{PD}} \cdot \frac{S_w \cdot \phi}{S_i} \cdot ([PGA]_{BSC} - [PGA]_{MC})$$

$$V_{TGAP} = J_{GAP\_PD} \cdot \frac{S_{PD}}{S_i} = \frac{D_{GAP\_PD}}{l_{PD}} \cdot \frac{S_w \cdot \phi}{S_i} \cdot ([GAP]_{MC} - [PGA]_{BSC})$$

$$V_{TDHAP} = J_{DHAP\_PD} \cdot \frac{S_{PD}}{S_i} = \frac{D_{DHAP\_PD}}{l_{PD}} \cdot \frac{S_w \cdot \phi}{S_i} \cdot ([DHAP]_{MC} - [DHAP]_{BSC})$$

$$V_{TOAA\_M} = V_{m\_OAA\_M} \cdot \frac{\left( [OAA]_{MC} - \frac{[OAA]_{Mchl}}{K_{i\_OAA\_M}} \right)}{[OAA]_{MC} + K_{m\_OAA\_M} \cdot \left( 1 + \frac{[malate]_{MC}}{K_{imal\_OAA\_M}} \right)}$$

$$V_{TMAL\_M} = \frac{V_{MAL\_M} \cdot ([MAL]_{Mchl} - [MAL]_{MC})}{[MAL]_{Mchl} + K_{mMAL\_MAL\_M} \cdot \left( 1 + \frac{[OAA]_{Mchl}}{K_{iOAA\_MAL\_M}} \right)}$$

$$V_{TMAL\_B} = \frac{V_{MAL\_B} \cdot ([MAL]_{BSC} - [MAL]_{Bchl})}{[MAL]_{BSC} + K_{mMAL\_MAL\_B}}$$

$$V_{TPYR\_B} = \frac{V_{m\_PYR\_B} \cdot [PYR]_{Bchl}}{([PYR]_{Bchl} + K_{m\_PYR\_B})}$$

$$V_{TPYR\_M} = \frac{V_{m\_PYR\_M} \cdot [PYR]_{MC}}{[PYR]_{MC} + K_{m\_PYR\_M}}$$

$$V_{TPEP\_M} = \frac{V_{m\_PEP\_M} \cdot [PEP]_{Mchl}}{[PEP]_{Mchl} + K_{m\_PEP\_M}}$$

$$V_{TPGA\_B} = \frac{V_{m\_C3P\_B} \cdot [PGA]_{Bchl}}{[PGA]_{Bchl} + K_{mPGA} \cdot \left( 1 + \frac{[DHAP]_{Bchl}}{K_{mDHAP}} \right) \left( 1 + \frac{[GAP]_{Bchl}}{K_{mGAP}} \right)} - \frac{V_{m\_C3P\_B} \cdot [PGA]_{BSC}}{[PGA]_{BSC} + K_{mPGA} \cdot \left( 1 + \frac{[DHAP]_{BSC}}{K_{mDHAP}} \right) \left( 1 + \frac{[GAP]_{BSC}}{K_{mGAP}} \right)}$$

$$V_{TGAP\_B} = \frac{V_{m\_C3P\_B} \cdot [GAP]_{BSC}}{[GAP]_{BSC} + K_{mGAP} \cdot \left(1 + \frac{[DHAP]_{BSC}}{K_{mDHAP}}\right) \left(1 + \frac{[PGA]_{BSC}}{K_{mPGA}}\right)} - \frac{V_{m\_C3P\_B} \cdot [GAP]_{Bchl}}{[GAP]_{Bchl} + K_{mGAP} \cdot \left(1 + \frac{[DHAP]_{Bchl}}{K_{mDHAP}}\right) \left(1 + \frac{[PGA]_{Bchl}}{K_{mPGA}}\right)}$$

$$V_{TDHAP\_B} = \frac{V_{m\_C3P\_B} \cdot [DHAP]_{BSC}}{[DHAP]_{BSC} + K_{mDHAP} \cdot \left(1 + \frac{[GAP]_{BSC}}{K_{mGAP}}\right) \left(1 + \frac{[PGA]_{BSC}}{K_{mPGA}}\right)} - \frac{V_{m\_C3P\_B} \cdot [DHAP]_{Bchl}}{[DHAP]_{Bchl} + K_{mDHAP} \cdot \left(1 + \frac{[GAP]_{Bchl}}{K_{mGAP}}\right) \left(1 + \frac{[PGA]_{Bchl}}{K_{mPGA}}\right)}$$

$$V_{TPGA\_M} = \frac{V_{m\_C3P\_B} \cdot [PGA]_{MC}}{[PGA]_{MC} + K_{mPGA} \cdot \left(1 + \frac{[DHAP]_{MC}}{K_{mDHAP}}\right) \left(1 + \frac{[GAP]_{MC}}{K_{mGAP}}\right)} - \frac{V_{m\_C3P\_B} \cdot [PGA]_{Mchl}}{[PGA]_{Mchl} + K_{mPGA} \cdot \left(1 + \frac{[DHAP]_{Mchl}}{K_{mDHAP}}\right) \left(1 + \frac{[GAP]_{Mchl}}{K_{mGAP}}\right)}$$

$$V_{TGAP\_M} = \frac{V_{m\_C3P\_B} \cdot [GAP]_{Mchl}}{[GAP]_{Mchl} + K_{mGAP} \cdot \left(1 + \frac{[DHAP]_{Mchl}}{K_{mDHAP}}\right) \left(1 + \frac{[PGA]_{Mchl}}{K_{mPGA}}\right)} - \frac{V_{m\_C3P\_B} \cdot [GAP]_{MC}}{[GAP]_{MC} + K_{mGAP} \cdot \left(1 + \frac{[DHAP]_{MC}}{K_{mDHAP}}\right) \left(1 + \frac{[PGA]_{MC}}{K_{mPGA}}\right)}$$

$$V_{TDHAP\_M} = \frac{V_{m\_C3P\_B} \cdot [DHAP]_{Mchl}}{[DHAP]_{Mchl} + K_{mDHAP} \cdot \left(1 + \frac{[GAP]_{Mchl}}{K_{mGAP}}\right) \left(1 + \frac{[PGA]_{Mchl}}{K_{mPGA}}\right)} - \frac{V_{m\_C3P\_B} \cdot [DHAP]_{MC}}{[DHAP]_{MC} + K_{mDHAP} \cdot \left(1 + \frac{[GAP]_{MC}}{K_{mGAP}}\right) \left(1 + \frac{[PGA]_{MC}}{K_{mPGA}}\right)}$$

#### 4.1.12 Carbon isotope ( $^{13}\text{CO}_2$ ) discrimination

$$^{13}C_i = C_i \cdot R_a \cdot \frac{1}{\alpha_0}$$

$$^{12}C_i = C_i \cdot \left(1 - R_a \cdot \frac{1}{\alpha_0}\right)$$

$$v_{inf\_h} = g_m \cdot \frac{1}{S_c} \cdot 10^{-3} \cdot \frac{1}{\alpha_1} \cdot (^{13}C_i - [^{13}\text{CO}_2]_{MC})$$

$$v'_{inf} = g_m \cdot \frac{1}{S_c} \cdot 10^{-3} \cdot (^{12}C_i - [^{12}\text{CO}_2]_{MC})$$

$$v_{1\_h} = v_1 \cdot \frac{1}{\alpha_2} \cdot \frac{1}{\alpha_3} \cdot \frac{[^{13}\text{CO}_2]_{MC}}{[^{12}\text{CO}_2]_{MC}}$$

$$v_{2\_h} = v_2 \cdot \frac{1}{\alpha_4} \cdot \frac{[H^{13}\text{CO}_3]_{Bchl}}{[H^{12}\text{CO}_3]_{Bchl}}$$

$$v_{4\_h} = v_4 \cdot \frac{v_{2\_h}}{v_2}$$

$$v_{6\_h} = v_6 \cdot \frac{1}{\alpha_5} \cdot \frac{[^{13}\text{CO}_2]_{Bchl}}{[^{12}\text{CO}_2]_{Bchl}}$$

$$v_{leak\_Bchl\_h} = P_{\text{CO}_2\_Bchl} \cdot \frac{S_{chl}}{S_l} \cdot \frac{1}{\alpha_6} \cdot ([^{13}\text{CO}_2]_{Bchl} - [^{13}\text{CO}_2]_{BSC})$$

$$v_{leak\_h} = \frac{D_{\text{CO}_2\_PD}}{l_{PD}} \cdot \frac{S_w \cdot \varphi}{S_l} \cdot \frac{1}{\alpha_6} \cdot ([^{13}\text{CO}_2]_{BSC} - [^{13}\text{CO}_2]_{MC})$$

$$R_{d\_h} = R_d \cdot \frac{R_a}{1 + \Delta_l}$$

$$R'_d = R_d \cdot \left(1 - \frac{R_a}{1 + \Delta_l}\right)$$

$$v_{pr5\_h} = v_{pr5} \cdot \frac{R_a}{1 + \Delta_l}$$

$$v'_{pr5} = v_{pr5} \cdot \left(1 - \frac{R_a}{1 + \Delta_l}\right)$$

## 4.2. Differential Equations

### 4.2.1. Metabolite concentration changes in mesophyll cell cytosol

$$\frac{d[CO_2]_{MC}}{dt} = (v_{inf} - v_1 + v_{leak} + R_m) \cdot \frac{1}{Vol_{Mcyto}}$$

$$\frac{d[HCO_3]_{MC}}{dt} = (v_1 - v_2) \cdot \frac{1}{Vol_{Mcyto}}$$

$$\frac{d[OAA]_{MC}}{dt} = (v_2 - v_{OAA\_M}) \cdot \frac{1}{Vol_{Mcyto}}$$

$$\frac{d[PEP]_{MC}}{dt} = (v_{PEP\_M} - v_2 + v_{Ex}) \cdot \frac{1}{Vol_{Mcyto}}$$

$$\frac{d[Malate]_{MC}}{dt} = (v_{MAL\_M} - v_{MAL}) \cdot \frac{1}{Vol_{Mcyto}}$$

$$\frac{d[Pyruvate]_{MC}}{dt} = (v_{PYR} - v_{PYR\_M}) \cdot \frac{1}{Vol_{Mcyto}}$$

$$\frac{d[PGA]_{MC}}{dt} = (v_{PGA} - v_{PGA\_M} - v_{Ex} - v_{PGASink}) \cdot \frac{1}{Vol_{Mcyto}}$$

$$\frac{d[FBP]_{MC}}{dt} = (v_{Suc1} - v_{Suc2}) \cdot \frac{1}{Vol_{Mcyto}}$$

$$\frac{d[UDPG]_{MC}}{dt} = (v_{Suc7} - v_{Suc8}) \cdot \frac{1}{Vol_{Mcyto}}$$

$$\frac{d[SUCP]_{MC}}{dt} = (v_{Suc8} - v_{Suc9}) \cdot \frac{1}{Vol_{Mcyto}}$$

$$\frac{d[SUC]_{MC}}{dt} = (v_{Suc9} - v_{Suc10}) \cdot \frac{1}{Vol_{Mcyto}}$$

$$\frac{d[F26BP]_{MC}}{dt} = (v_{Suc3} - v_{Suc4}) \cdot \frac{1}{Vol_{Mcyto}}$$

$$\frac{d[ATP]_{MC}}{dt} = (v_{iATP\_M} - v_{Suc7} - v_{Suc3}) \cdot \frac{1}{Vol_{Mcyto}}$$

$$\frac{d[T3P]_{MC}}{dt} = (v_{GAP\_M} + v_{DHAP\_M} - v_{GAP} - v_{DHAP} - 2v_{Suc1}) \cdot \frac{1}{Vol_{Mcyto}}$$

$$\frac{d[HexP]_{MC}}{dt} = (v_{Suc2} + v_{Suc4} - v_{Suc3} - v_{Suc7} - v_{Suc8}) \cdot \frac{1}{Vol_{Mcyto}}$$

#### 4.2.2. Metabolite concentration changes in mesophyll cell chloroplast

$$\frac{d[OAA]_{Mchl}}{dt} = (v_{OAA\_M} - v_3) \cdot \frac{1}{Vol_{Mchl}}$$

$$\frac{d[Malate]_{Mchl}}{dt} = (v_3 - v_{MAL\_M}) \cdot \frac{1}{Vol_{Mchl}}$$

$$\frac{d[PEP]_{Mchl}}{dt} = (v_5 - v_{PEP\_M}) \cdot \frac{1}{Vol_{Mchl}}$$

$$\frac{d[Pyruvate]_{Mchl}}{dt} = (v_{PYR\_M} - v_5) \cdot \frac{1}{Vol_{Mchl}}$$

$$\frac{d[NADPH]_{Mchl}}{dt} = (v_{NADGPHM} - v_3 - v_{8Mchl}) \cdot \frac{1}{Vol_{Mchl}}$$

$$\frac{d[ATP]_{Mchl}}{dt} = (v_{ATPM} - 2v_5 - v_{7Mchl} - v_{tATP}) \cdot \frac{1}{Vol_{Mchl}}$$

$$\frac{d[PGA]_{Mchl}}{dt} = (v_{PGA\_M} - v_{7Mchl}) \cdot \frac{1}{Vol_{Mchl}}$$

$$\frac{d[T3P]_{Mchl}}{dt} = (v_{8Mchl} - v_{GAP\_M} - v_{DHAP\_M}) \cdot \frac{1}{Vol_{Mchl}}$$

#### 4.2.3. Metabolite concentration changes in bundle sheath cell cytosol

$$\frac{d[T3P]_{BSC}}{dt} = (v_{GAP} + v_{DHAP} - v_{GAP\_B} - v_{DHAP\_B}) \cdot \frac{1}{Vol_{Bcyto}}$$

$$\frac{d[PGA]_{BSC}}{dt} = (v_{PGA\_B} - v_{PGA}) \cdot \frac{1}{Vol_{Bcyto}}$$

$$\frac{d[Malate]_{BSC}}{dt} = (v_{MAL} - v_{MAL\_B}) \cdot \frac{1}{Vol_{Bcyto}}$$

$$\frac{d[Pyruvate]_{BSC}}{dt} = (v_{PYR\_B} - v_{PYR}) \cdot \frac{1}{Vol_{Bcyto}}$$

$$\frac{d[CO_2]_{BSC}}{dt} = (v_{leak\_Bchl} + v_{Pr5} + R_b - v_{leak}) \cdot \frac{1}{Vol_{Bcyto}}$$

#### 4.2.4. Metabolite concentration changes in bundle sheath cell chloroplast

$$\frac{d[CO_2]_{Bchl}}{dt} = (v_4 - v_6 - v_{leak\_Bchl}) \cdot \frac{1}{Vol_{Bchl}}$$

$$\frac{d[RuBP]_{Bchl}}{dt} = (v_{18} - v_6 - v_{Pr1}) \cdot \frac{1}{Vol_{Bchl}}$$

$$\frac{d[PGA]_{Bchl}}{dt} = (2v_6 - v_7 - v_{PGA\_B} + v_{Pr1} + v_{Pr8}) \cdot \frac{1}{Vol_{Bchl}}$$

$$\frac{d[ATP]_{Bchl}}{dt} = (v_{ATPB} - v_7 - v_{18} - v_{sta3} - v_{Pr8}) \cdot \frac{1}{Vol_{Bchl}}$$

$$\frac{d[NADPH]_{Bchl}}{dt} = (v_4 - v_8) \cdot \frac{1}{Vol_{Bchl}}$$

$$\frac{d[SBP]_{Bchl}}{dt} = (v_{12} - v_{13}) \cdot \frac{1}{Vol_{Bchl}}$$

$$\frac{d[S7P]_{Bchl}}{dt} = (v_{13} - v_{15}) \cdot \frac{1}{Vol_{Bchl}}$$

$$\frac{d[FBP]_{Bchl}}{dt} = (v_{10} - v_{11}) \cdot \frac{1}{Vol_{Bchl}}$$

$$\frac{d[E4P]_{Bchl}}{dt} = (v_{14} - v_{12}) \cdot \frac{1}{Vol_{Bchl}}$$

$$\frac{d[T3P]_{Bchl}}{dt} = (v_{GAP\_B} + v_{DHAP\_B} + v_8 - 2v_{10} - v_{14} - v_{15} - v_{12}) \cdot \frac{1}{Vol_{Bchl}}$$

$$\frac{d[HexP]_{Bchl}}{dt} = (v_{11} - v_{14} - v_{Sta3}) \cdot \frac{1}{Vol_{Bchl}}$$

$$\frac{d[Pent]_{Bchl}}{dt} = (v_{14} + 2v_{15} - v_{18}) \cdot \frac{1}{Vol_{Bchl}}$$

$$\frac{d[Malate]_{Bchl}}{dt} = (v_{MAL\_B} - v_4) \cdot \frac{1}{Vol_{Bchl}}$$

$$\frac{d[Pyruvate]_{Bchl}}{dt} = (v_4 - v_{PYR\_B}) \cdot \frac{1}{Vol_{Bchl}}$$

$$\frac{d[PPi]_{Bchl}}{dt} = (v_{Sta3} - v_{Sta4}) \cdot \frac{1}{Vol_{Bchl}}$$



$$\frac{d[ADPG]_{Bchl}}{dt} = (v_{Sta3} - v_{Sta5}) \cdot \frac{1}{Vol_{Bchl}}$$

$$\frac{d[PGCA]_{Bchl}}{dt} = (v_{Pr1} - v_{Pr2}) \cdot \frac{1}{Vol_{Bchl}}$$

$$\frac{d[GCA]_{Bchl}}{dt} = (v_{Pr2} - v_{Pr9}) \cdot \frac{1}{Vol_{Bchl}}$$

$$\frac{d[GCEA]_{Bchl}}{dt} = (v_{Pr10} - v_{Pr8}) \cdot \frac{1}{Vol_{Bchl}}$$

#### 4.2.5. Metabolite concentration changes in bundle sheath cell peroxisome

$$\frac{d[GCA]_{Bper}}{dt} = (v_{Pr9} - v_{Pr3}) \cdot \frac{1}{Vol_{Bper}}$$

$$\frac{d[GOA]_{Bper}}{dt} = (v_{Pr3} - v_{Pr4} - v_{Pr6}) \cdot \frac{1}{Vol_{Bper}}$$

$$\frac{d[GLY]_{Bper}}{dt} = (v_{Pr4} + v_{Pr6} - 2v_{Pr5}) \cdot \frac{1}{Vol_{Bper}}$$

$$\frac{d[SER]_{Bper}}{dt} = (v_{Pr5} - v_{Pr6}) \cdot \frac{1}{Vol_{Bper}}$$

$$\frac{d[HPR]_{Bper}}{dt} = (v_{Pr6} - v_{Pr7}) \cdot \frac{1}{Vol_{Bper}}$$

$$\frac{d[GCEA]_{Bper}}{dt} = (v_{Pr7} - v_{Pr10}) \cdot \frac{1}{Vol_{Bper}}$$

#### 4.2.6. Metabolite concentration changes for calculation of Carbon isotope (<sup>13</sup>CO<sub>2</sub>) discrimination

$$\frac{d[CO_2]_{MC}}{dt} = (v'_{inf} - v_1 + v_{leak} + R'_m) \cdot \frac{1}{Vol_{Mcyto}}$$

$$\frac{d[OAA]_{MC}}{dt} = ((v_2 + v_{2_h}) - v_{OAA_M}) \cdot \frac{1}{Vol_{Mcyto}}$$

$$\frac{d[PEP]_{MC}}{dt} = (v_{PEP_M} - (v_2 + v_{2_h}) + v_{Ex}) \cdot \frac{1}{Vol_{Mcyto}}$$

$$\frac{d[CO_2]_{BSC}}{dt} = (v_{leak\_Bchl} + v'_{Pr5} + R'_b - v_{leak}) \cdot \frac{1}{Vol_{Bcyto}}$$

$$\frac{d[RuBP]_{Bchl}}{dt} = (v_{18} - (v_6 + v_{6\_h}) - v_{Pr1}) \cdot \frac{1}{Vol_{Bchl}}$$

$$\frac{d[PGA]_{Bchl}}{dt} = (2 \cdot (v_6 + v_{6\_h}) - v_7 - v_{PGA\_B} + v_{Pr1} + v_{Pr8}) \cdot \frac{1}{Vol_{Bchl}}$$

$$\frac{d[Malate]_{Bchl}}{dt} = (v_{MAL\_B} - (v_4 + v_{4\_h})) \cdot \frac{1}{Vol_{Bchl}}$$

$$\frac{d[Pyruvate]_{Bchl}}{dt} = ((v_4 + v_{4\_h}) - v_{PYR\_B}) \cdot \frac{1}{Vol_{Bchl}}$$

$$\frac{d[NADPH]_{Bchl}}{dt} = ((v_4 + v_{4\_h}) - v_8) \cdot \frac{1}{Vol_{Bchl}}$$

$$\frac{d[^{13}CO_2]_{MC}}{dt} = (v_{inf\_h} - v_{1\_h} + v_{leak\_h} + R'_{m\_h}) \cdot \frac{1}{Vol_{Mcyto}}$$

$$\frac{d[H^{13}CO_3]_{MC}}{dt} = (v_{1\_h} - v_{2\_h}) \cdot \frac{1}{Vol_{Mcyto}}$$

$$\frac{d[^{13}CO_2]_{BSC}}{dt} = (v_{leak\_Bchl\_h} + v_{Pr5\_h} + R'_{b\_h} - v_{leak\_h}) \cdot \frac{1}{Vol_{Bcyto}}$$

$$\frac{d[^{13}CO_2]_{Bchl}}{dt} = (v_{4\_h} - v_{6\_h} - v_{leak\_Bchl\_h}) \cdot \frac{1}{Vol_{Bchl}}$$

### 4.3. Constants

#### 4.3.1. Constants in mesophyll cell cytosol

$$[CA]_{MC} = [ATP]_{MC} - [ADP]_{MC}$$

$$[CU]_{MC} = [UDP]_{MC} + [UTP]_{MC} + [UDPG]_{MC}$$

$$[CP]_{MC} = [PiT]_{MC} + 2[FBP]_{MC} + 2[F26BP]_{MC} + [PGA]_{MC} + [T3P]_{MC} + [HexP]_{MC} + [SUCP]_{MC} + [UTP]_{MC} + [ATP]_{MC} + [PEP]_{MC}$$

$$[Pi]_{MC} = \frac{1}{2} (\sqrt{K_{ePi}^2 + 4 \cdot K_{ePi} \cdot [PiT]_{MC}} - K_{ePi})$$

$$[PPi]_{MC} = [PiT]_{MC} - [Pi]_{MC}$$

$$[GAP]_{MC} = \frac{K_{e\_9} \cdot [T3P]_{MC}}{(1 + K_{e\_9})}$$

$$[DHAP]_{MC} = \frac{[T3P]_{MC}}{(1 + K_{e\_9})}$$

$$[G6P]_{MC} = \frac{[HexP]_{MC}}{\frac{1}{K_{e\_Suc5}} + K_{e\_Suc6} + 1}$$

$$[G1P]_{MC} = \frac{K_{e\_Suc6} \cdot [HexP]_{MC}}{\frac{1}{K_{e\_Suc5}} + K_{e\_Suc6} + 1}$$

$$[F6P]_{MC} = \frac{\frac{[HexP]_{MC}}{K_{e\_Suc5}}}{\frac{1}{K_{e\_Suc5}} + K_{e\_Suc6} + 1}$$

#### 4.3.2. Constants in mesophyll cell chloroplast

$$[CA]_{Mchl} = [ATP]_{Mchl} + [ADP]_{Mchl}$$

$$[CN]_{Mchl} = [NADPH]_{Mchl} + [NADP]_{Mchl}$$

$$[CP]_{Mchl} = [Pi]_{Mchl} + [PGA]_{Mchl} + 2[DPGA]_{Mchl} + [T3P]_{Mchl} + [ATP]_{Mchl} + [PEP]_{Mchl}$$

$$[GAP]_{Mchl} = \frac{K_{e\_9} \cdot [T3P]_{Mchl}}{(1 + K_{e\_9})}$$

$$[DHAP]_{Mchl} = \frac{[T3P]_{Mchl}}{(1 + K_{e\_9})}$$

#### 4.3.3. Conatants in bundle sheath cell cytosol

$$[GAP]_{BSC} = \frac{K_{e\_9} \cdot [T3P]_{BSC}}{(1 + K_{e\_9})}$$

$$[DHAP]_{BSC} = \frac{[T3P]_{BSC}}{(1 + K_{e\_9})}$$

#### 4.3.4. Conatants in bundle sheath cell chloroplast

$$[CA]_{Bchl} = [ATP]_{Bchl} + [ADP]_{Bchl} + [ADPG]_{Bchl}$$

$$[CN]_{Bchl} = [NADPH]_{Bchl} + [NADP]_{Bchl}$$

$$[CP]_{Bchl} = [Pi]_{Bchl} + [PGA]_{Bchl} + 2[DPGA]_{Bchl} + [T3P]_{Bchl} + 2[FBP]_{Bchl} + [HexP]_{Bchl} + [E4P]_{Bchl} + 2[SBP]_{Bchl} + [S7P]_{Bchl} + [Pent]_{Bchl} + 2[RuBP]_{Bchl} + [ATP]_{Bchl} + [PGCA]_{Bchl} + 2[PPi]_{Bchl}$$

$$[GAP]_{Bchl} = \frac{K_{e\_9} \cdot [T3P]_{Bchl}}{(1 + K_{e\_9})}$$

$$[DHAP]_{Bchl} = \frac{[T3P]_{Bchl}}{(1 + K_{e\_9})}$$

$$[G6P]_{Bchl} = \frac{[HexP]_{Bchl}}{\frac{1}{K_{e\_Sta1}} + K_{e\_Sta2} + 1}$$

$$[G1P]_{Bchl} = \frac{K_{e\_Sta2} \cdot [HexP]_{Bchl}}{\frac{1}{K_{e\_Sta1}} + K_{e\_Sta2} + 1}$$

$$[F6P]_{Bchl} = \frac{\frac{[HexP]_{Bchl}}{K_{e\_Sta1}}}{\frac{1}{K_{e\_Sta1}} + K_{e\_Sta2} + 1}$$

$$[Xu5P]_{Bchl} = \frac{\frac{[PenP]_{Bchl}}{K_{e\_17}}}{\frac{1}{K_{e\_16}} + \frac{1}{K_{e\_17}} + 1}$$

$$[Ru5P]_{Bchl} = \frac{\frac{[PenP]_{Bchl}}{K_{e\_17}}}{\frac{1}{K_{e\_16}} + \frac{1}{K_{e\_17}} + 1}$$

$$[Ri5P]_{Bchl} = \frac{\frac{[PenP]_{Bchl}}{K_{e\_16}}}{\frac{1}{K_{e\_16}} + \frac{1}{K_{e\_17}} + 1}$$

## 5 Parameters

### 5.1 Vmax of photosynthetic enzymes

| EC                   | Numbering | Vmax ( $\mu\text{mol m}^{-2} \text{s}^{-1}$ ) | Reference                                                                      |
|----------------------|-----------|-----------------------------------------------|--------------------------------------------------------------------------------|
| 4.2.1.1              | 1         | 200000 or variable                            | Hatch and Burnell (1990) with modification                                     |
| 4.1.1.31             | 2         | 170 or variable                               | Kanai and Edwards (1999), Hatch (1987), von Caemmerer (2000) with modification |
| 1.1.1.82             | 3         | 90 or variable                                | Kanai and Edwards (1999), Hatch (1987) with modification                       |
| 1.1.1.40             | 4         | 90 or variable                                | Kanai and Edwards (1999), Hatch (1987) with modification                       |
| 2.7.9.1              | 5         | 90 or variable                                | Kanai and Edwards (1999), Hatch (1987) with modification                       |
| 4.1.1.39             | 6         | 65 or variable                                | Kanai and Edwards (1999), Hatch (1987), von Caemmerer (2000) with modification |
| 2.7.2.3 & 1.2.1.13   | 7 and 8   | 225 or variable                               | Laisk and Edwards. (2000), with modification                                   |
| 4.1.2.13FBP          | 10        | 58.5 or variable                              | Zhu <i>et al.</i> (2007) with modification                                     |
| 3.1.3.11             | 11        | 43.6 or variable                              | Zhu <i>et al.</i> (2007) with modification                                     |
| 4.1.2.13SBP          | 12        | 110 or variable                               | Zhu <i>et al.</i> (2007) with modification                                     |
| 3.1.3.37             | 13        | 29.2 or variable                              | Zhu <i>et al.</i> (2007) with modification                                     |
| 2.2.1.1X             | 14        | 281 or variable                               | Zhu <i>et al.</i> (2007) with modification                                     |
| 2.2.1.1R             | 15        | 281 or variable                               | Zhu <i>et al.</i> (2007) with modification                                     |
| 2.7.1.19             | 18        | 1170 or variable                              | Zhu <i>et al.</i> (2007) with modification                                     |
| 2.7.2.3M & 1.2.1.13M | 7M and 8M | 300 or variable                               | Laisk and Edwards. (2000), with modification                                   |
| 4.1.2.13FBP          | Suc1      | 8.05 or variable                              | Zhu <i>et al.</i> (2007) with modification                                     |

---

| <b>M</b>                    |           |                               |                                                 |
|-----------------------------|-----------|-------------------------------|-------------------------------------------------|
| <b>3.1.3.11M</b>            | Suc2      | 6.40 or variable              | Zhu <i>et al.</i> (2007) with modification      |
| <b>2.7.7.9</b>              | Suc7      | 5.77 or variable              | Zhu <i>et al.</i> (2007) with modification      |
| <b>2.4.1.14</b>             | Suc8      | 27.8 or variable              | Zhu <i>et al.</i> (2007) with modification      |
| <b>3.1.3.24</b>             | Suc9      | 27.8 or variable              | Zhu <i>et al.</i> (2007) with modification      |
| <b>2.7.1.105</b>            | Suc3      | 1.01 or variable              | Zhu <i>et al.</i> (2007) with modification      |
| <b>3.1.3.46</b>             | Suc4      | 0.841 or variable             | Zhu <i>et al.</i> (2007) with modification      |
| <b>2.7.7.27</b>             | Sta3      | 30 or variable                | Zhu <i>et al.</i> (2007) with modification      |
| <b>3.6.1.1</b>              | Sta4      | 1000 or variable              | Zhu <i>et al.</i> (2007) with modification      |
| <b>2.4.1.21</b>             | Sta5      | 25 or variable                | Zhu <i>et al.</i> (2007) with modification      |
| <b>StarchDag</b>            | StarchDag | 0 or 3.6                      | Assumed                                         |
| <b>PGASink</b>              | PGASink   | 2 or variable                 | Zhu <i>et al.</i> (2007) with modification      |
| <b>4.1.1.39PR</b>           | Pr1       | $Vm_6 * 0.11$ or variable     | Cousins <i>et al.</i> (2010) with modification  |
| <b>3.1.3.18</b>             | Pr2       | 2621 or variable              | Zhu <i>et al.</i> (2007) with modification      |
| <b>1.1.3.15</b>             | Pr3       | 72.8 or variable              | Zhu <i>et al.</i> (2007) with modification      |
| <b>2.6.1.4</b>              | Pr4       | 137 or variable               | Zhu <i>et al.</i> (2007) with modification      |
| <b>Gly_ser</b>              | Pr5       | 125 or variable               | Zhu <i>et al.</i> (2007) with modification      |
| <b>2.6.1.45</b>             | Pr6       | 165 or variable               | Zhu <i>et al.</i> (2007) with modification      |
| <b>1.1.1.29</b>             | Pr7       | 500 or variable               | Zhu <i>et al.</i> (2007) with modification      |
| <b>2.7.1.31</b>             | Pr8       | 286 or variable               | Zhu <i>et al.</i> (2007) with modification      |
| <b>Tgca</b>                 | Pr9       | 300 or variable               | Zhu <i>et al.</i> (2007) with modification      |
| <b>Tgcea</b>                | Pr10      | 250 or variable               | Zhu <i>et al.</i> (2007) with modification      |
| <b>5.4.2.1&amp;4.2.1.11</b> | Ex        | 1 or variable                 | Laisk and Edwards. (2000), with modification    |
| <b>JmaxM</b>                | JmaxM     | 300 or variable               | von Caemmerer (2000) with modification          |
| <b>JmaxB</b>                | JmaxB     | $JmaxM * (1-Y)/Y$ or variable | Assumed, von Caemmerer (2000) with modification |
| <b>3.6.3.14M</b>            | ATPM      | 300 or variable               | Assumed                                         |
| <b>3.6.3.14B</b>            | ATPB      | 300 or variable               | Assumed                                         |

---

|                  |                            |                 |         |
|------------------|----------------------------|-----------------|---------|
| <b>1.18.1.2M</b> | NADPHM                     | 200 or variable | Assumed |
| <b>TPTM</b>      | TPGAM,<br>TDHAPM,<br>TGAPM | 750 or variable | Assumed |
| <b>TPTB</b>      | TPGAM,<br>TDHAPM,<br>TGAPM | 750 or variable | Assumed |
| <b>DiT</b>       | TOAAM                      | 80 or variable  | Assumed |
|                  | TmalB                      | 150 or variable | Assumed |
|                  | TmalM                      | 150 or variable | Assumed |
| <b>PPT</b>       | TPEPM                      | 150 or variable | Assumed |
| <b>MEPM</b>      | TpyrM                      | 150 or variable | Assumed |
| <b>MEPB</b>      | TpyrB                      | 150 or variable | Assumed |

## 5.2 Michaelis-constant and other parameters

| EC              | Numbering | parameters                                                                                                                                             | Reference                                                                                                                            |
|-----------------|-----------|--------------------------------------------------------------------------------------------------------------------------------------------------------|--------------------------------------------------------------------------------------------------------------------------------------|
|                 | inf       | $g_m=0.7 \text{ mol m}^{-2} \text{ bar}^{-1}$<br>$Sc= 0.33 \times 10^{-4}$<br>$\text{mmol L}^{-1} \mu\text{bar}^{-1}$                                  | Assumed<br>Uchida <i>et al.</i> (1983), Hoofd <i>et al.</i> (1986)                                                                   |
| <b>4.2.1.1</b>  | 1         | $K_{mCO_2_1}=2.8 \text{ mM}$<br>$K_{mHCO_3_1}=34 \text{ mM}$<br>$[H^+]=10e-7.3\text{mM}$<br>$K_{e_1} = 5.6e-7\text{mM}$                                | Hatch and Burnell (1990)<br>Pocker and Miksch (1978)<br>Felle and Bertl (1986)<br>Pocker and Miksch (1978)                           |
| <b>4.1.1.31</b> | 2         | $K_{mHCO_3_2}=0.02 \text{ mM}$<br>$K_{mPEP_2} = 0.1 \text{ mM}$<br>$K_{imal_2}=0.5 \text{ mM}$                                                         | Uedan and Sugiyama (1976)<br>Mukerji (1977)<br>Gao and Woo (1996)                                                                    |
| <b>1.1.1.82</b> | 3         | $K_{mNADPH_3}=0.024 \text{ mM}$<br>$K_{mOAA_3}=0.056 \text{ mM}$<br>$K_{mNADP_3}=0.073 \text{ mM}$<br>$K_{mmal_3}=32.0 \text{ mM}$<br>$K_{e_3}=4450.0$ | Kagawa and Bruno (1988)<br>Kagawa and Bruno (1988)<br>Kagawa and Bruno (1988)<br>Kagawa and Bruno (1988)<br>Laisk and Edwards (2000) |

---

|                                   |         |                                   |                                                                                                                                                                                |
|-----------------------------------|---------|-----------------------------------|--------------------------------------------------------------------------------------------------------------------------------------------------------------------------------|
| <b>1.1.1.40</b>                   | 4       | $K_{mCO_2_4} = 1.1 \text{ mM}$    | Jenkins <i>et al.</i> (1987)                                                                                                                                                   |
|                                   |         | $K_{mNADP_4} = 0.0080 \text{ mM}$ | Detarsio <i>et al.</i> (2003)                                                                                                                                                  |
|                                   |         | $K_{mNADPH_4} = 0.045 \text{ mM}$ | Ziegler (1974)                                                                                                                                                                 |
|                                   |         | $K_{mPyr_4} = 3.0 \text{ mM}$     | Ziegler (1974)                                                                                                                                                                 |
|                                   |         | $K_{mmal_4} = 0.23 \text{ mM}$    | Detarsio <i>et al.</i> (2003)                                                                                                                                                  |
|                                   |         | $K_{e_4} = 0.051 \text{ mM}$      | Harary <i>et al.</i> (1953)                                                                                                                                                    |
| <b>2.7.9.1</b>                    | 5       | $K_{iPEP_5} = 0.15 \text{ mM}$    | Jenkins and Hatch (1985)                                                                                                                                                       |
|                                   |         | $K_{mATP_5} = 0.082 \text{ mM}$   | Jenkins and Hatch (1985)                                                                                                                                                       |
|                                   |         | $K_{mPyr_5} = 0.082 \text{ mM}$   | Jenkins and Hatch (1985)                                                                                                                                                       |
| <b>4.1.1.39</b>                   | 6       | $K_{mCO_2_6} = 0.0162 \text{ mM}$ | Cousins <i>et al.</i> (2010)                                                                                                                                                   |
|                                   |         | $K_{mO_2_6} = 0.222 \text{ mM}$   | Cousins <i>et al.</i> (2010)                                                                                                                                                   |
|                                   |         | $K_{mRuBP_6} = 0.02 \text{ mM}$   | Farquhar (1979)                                                                                                                                                                |
|                                   |         | $K_{iPGA_6} = 2.52 \text{ mM}$    | Assumed, Badger and Lorimer (1981)                                                                                                                                             |
|                                   |         | $K_{iFBP_6} = 0.04 \text{ mM}$    | Badger and Lorimer (1981)                                                                                                                                                      |
|                                   |         | $K_{iSBP_6} = 0.75 \text{ mM}$    | Badger and Lorimer (1981)                                                                                                                                                      |
|                                   |         | $K_{iPi_6} = 3.6 \text{ mM}$      | Assumed, Badger and Lorimer (1981)                                                                                                                                             |
|                                   |         | $K_{iNADPH_6} = 0.21 \text{ mM}$  | Assumed, Badger and Lorimer (1981)                                                                                                                                             |
| <b>2.7.2.3 &amp;<br/>1.2.1.13</b> | 7 and 8 | $K_{mPGA_78} = 1 \text{ mM}$      | Laisk and Edwards (2000)                                                                                                                                                       |
|                                   |         | $K_{mATP_78} = 0.3 \text{ mM}$    | Laisk and Edwards (2000)                                                                                                                                                       |
|                                   |         | $K_{mNADPH_78} = 0.05 \text{ mM}$ | Ferri <i>et al.</i> (1978), Trost (1993),<br>Macioszek and Anderson (1987),<br>Baalmann <i>et al.</i> , 1995, Sparla <i>et al.</i> ,<br>(2004), Sparla <i>et al.</i> , (2005), |
| <b>5.3.1.1</b>                    | 9       | $K_{e_9} = 0.05$                  | Bassham and Krause (1969)                                                                                                                                                      |

---



---

|                    |    |                                     |                                                                 |
|--------------------|----|-------------------------------------|-----------------------------------------------------------------|
| <b>4.1.2.13FBP</b> | 10 | $K_{mDHAP_{10}}=0.4$ mM             | Iwaki <i>et al.</i> (1991)                                      |
|                    |    | $K_{mGAP_{10}}=0.3$ mM              | Iwaki <i>et al.</i> (1991), Zhu <i>et al.</i> (2007)            |
|                    |    | $K_{mFBP_{10}}=0.02$ mM             | Brooks and Criddle (1966),<br>Schnarrenberger and Kruger (1986) |
|                    |    | $K_{e_{10}}=7.1$ mM <sup>-1</sup>   | Bassham and Krause (1969),<br>Iwaki <i>et al.</i> (1991)        |
| <b>3.1.3.11</b>    | 11 | $K_{iF6P_{11}}=0.7$ mM              | Heldt (1983)                                                    |
|                    |    | $K_{iPi_{11}}=12.0$ mM              | Charles and Halliwell (1981)                                    |
|                    |    | $K_{mFBP_{11}}=0.033$ mM            | Charles and Halliwell (1981)                                    |
|                    |    | $K_{e_{11}}=666000.0$ mM            | Bassham and Krause (1969) , Laisk <i>et al.</i> (1989)          |
| <b>4.1.2.13SBP</b> | 12 | $K_{mDHAP_{12}}=0.4$ mM             | Iwaki <i>et al.</i> (1991)                                      |
|                    |    | $K_{mE4P_{12}}=0.2$ mM              | Zhu <i>et al.</i> (2007)                                        |
|                    |    | $K_{mSBP_{12}}=0.02$ mM             | Brooks and Criddle (1966)                                       |
|                    |    | $K_{e_{12}}=1.017$ mM <sup>-1</sup> | Bassham and Krause (1969) , Laisk <i>et al.</i> (1989)          |
| <b>3.1.3.37</b>    | 13 | $K_{iPi_{13}}=12.0$ mM              | Woodrow <i>et al.</i> (1983)                                    |
|                    |    | $K_{mSBP_{13}}=0.05$ mM             | Woodrow <i>et al.</i> (1983), Cadet and Meunier (1988)          |
|                    |    | $K_{e_{13}}=666000.0$ mM            | Bassham and Krause (1969), Laisk <i>et al.</i> (1989)           |
| <b>2.2.1.1X</b>    | 14 | $K_{mE4P_{14}}=0.1$ mM              | Zhu <i>et al.</i> (2007)                                        |
|                    |    | $K_{mF6P_{14}}=0.1$ mM              | Zhu <i>et al.</i> (2007)                                        |
|                    |    | $K_{mGAP_{14}}=0.1$ mM              | Sprenger <i>et al.</i> (1995), Schenk <i>et al.</i>             |

---

---

|                    |      |                                       |                                                                                   |
|--------------------|------|---------------------------------------|-----------------------------------------------------------------------------------|
|                    |      |                                       | (1998), Zhu <i>et al.</i> (2007)                                                  |
|                    |      | $K_{mXu5P} = 0.1 \text{ mM}$          | Schenk <i>et al.</i> (1998), Laisk <i>et al.</i> (1989), Zhu <i>et al.</i> (2007) |
|                    |      | $K_{e_{14}} = 0.084$                  | Datta <i>et al.</i> (1961).                                                       |
| <b>2.2.1.1R</b>    | 15   | $K_{mGAP_{15}} = 0.072 \text{ mM}$    | Albe (1991); Laisk <i>et al.</i> (1989)                                           |
|                    |      | $K_{mRi5P_{15}} = 1.5 \text{ mM}$     | Albe (1991); Laisk <i>et al.</i> (1989)                                           |
|                    |      | $K_{mS7P_{15}} = 0.46 \text{ mM}$     | Albe (1991); Laisk <i>et al.</i> (1989)                                           |
|                    |      | $K_{mXu5P_{15}} = 0.1 \text{ mM}$     | Albe (1991); Laisk <i>et al.</i> (1989)                                           |
|                    |      | $K_{e_{15}} = 1.176$                  | Bassham and Krause (1969), Laisk <i>et al.</i> (1989)                             |
| <b>5.3.1.6</b>     | 16   | $K_{e_{16}} = 0.4$                    | Bassham and Krause (1969)                                                         |
| <b>5.1.3.1</b>     | 17   | $K_{e_{17}} = 0.67$                   | Bassham and Krause, (1969)                                                        |
| <b>2.7.1.19</b>    | 18   | $K_{iADP_{18}} = 2.5 \text{ mM}$      | Gardemann <i>et al.</i> (1983)                                                    |
|                    |      | $K_{i_{ADP}_{18}} = 0.4 \text{ mM}$   | Gardemann <i>et al.</i> (1983)                                                    |
|                    |      | $K_{iPGA_{18}} = 2.0 \text{ mM}$      | Gardemann <i>et al.</i> (1983)                                                    |
|                    |      | $K_{iPi_{18}} = 4.0 \text{ mM}$       | Gardemann <i>et al.</i> (1983)                                                    |
|                    |      | $K_{iRuBP_{18}} = 0.7 \text{ mM}$     | Gardemann <i>et al.</i> (1983)                                                    |
|                    |      | $K_{mATP_{18}} = 0.625 \text{ mM}$    | Slabas <i>et al.</i> (1976)                                                       |
|                    |      | $K_{mRu5P_{18}} = 0.05 \text{ mM}$    | Gardemann <i>et al.</i> (1983), Omnaas <i>et al.</i> (1985)                       |
|                    |      | $K_{e_{18}} = 6846.0$                 | Bassham and Krause (1969), Laisk <i>et al.</i> (1989)                             |
| <b>4.1.2.13FBP</b> | Suc1 | $K_{mDHAP_{Suc1}} = 0.45 \text{ mM}$  | Iwaki <i>et al.</i> (1991)                                                        |
| <b>M</b>           |      | $K_{mGAP_{Suc1}} = 0.04 \text{ mM}$   | Iwaki <i>et al.</i> (1991)                                                        |
|                    |      | $K_{mFBP_{Suc1}} = 0.023 \text{ mM}$  | Schnarrenberger (1986)                                                            |
|                    |      | $K_{e_{Suc1}} = 12.0 \text{ mM}^{-1}$ | Thomas <i>et al.</i> (1997), Zhu <i>et al.</i> (2007)                             |

---

---

|                  |      |                                      |                              |
|------------------|------|--------------------------------------|------------------------------|
| <b>3.1.3.11M</b> | Suc2 | $K_{iF26BP\_Suc2} = 0.007 \text{mM}$ | Jang <i>et al.</i> (2003)    |
|                  |      | $K_{iF6P\_Suc2} = 0.7 \text{ mM}$    | Heldt <i>et al.</i> (1983)   |
|                  |      | $K_{iPi\_Suc2} = 12.0 \text{ mM}$    | Charles & Halliwell (1981)   |
|                  |      | $K_{mFBP\_Suc2} = 0.0025 \text{mM}$  | Jang <i>et al.</i> (2003)    |
|                  |      | $K_{e\_Suc2} = 174.0 \text{ mM}$     | Lawson <i>et al.</i> (1976)  |
| <b>5.3.1.9M</b>  | Suc5 | $K_{e\_Suc5} = 2.3$                  | Bassham and Krause (1969),   |
| <b>5.4.2.2M</b>  | Suc6 | $K_{e\_Suc6} = 0.0584$               | Bassham and Krause (1969),   |
| <b>2.7.7.9</b>   | Suc7 | $K_{mG1P\_Suc7} = 0.14 \text{ mM}$   | Nakano <i>et al.</i> (1989)  |
|                  |      | $K_{mPPi\_Suc7} = 0.11 \text{ mM}$   | Nakano <i>et al.</i> (1989)  |
|                  |      | $K_{mUDPG\_Suc7} = 0.12 \text{mM}$   | Nakano <i>et al.</i> (1989)  |
|                  |      | $K_{mUTP\_Suc7} = 0.1 \text{ mM}$    | Nakano <i>et al.</i> (1989)  |
|                  |      | $K_{e\_Suc7} = 0.31 \text{ mM}$      | Hansen <i>et al.</i> (1966). |
| <b>2.4.1.14</b>  | Suc8 | $K_{iFBP\_Suc8} = 0.8 \text{ mM}$    | Harbron <i>et al.</i> (1981) |
|                  |      | $K_{iPi\_Suc8} = 11.0 \text{ mM}$    | Harbron <i>et al.</i> (1981) |
|                  |      | $K_{iSuc\_Suc8} = 50.0 \text{ mM}$   | Salermo and Pontis (1978)    |
|                  |      | $K_{iSucP\_Suc8} = 0.4 \text{ mM}$   | Harbron <i>et al.</i> (1981) |
|                  |      | $K_{iUDP\_Suc8} = 0.7 \text{ mM}$    | Harbron <i>et al.</i> (1981) |
|                  |      | $K_{mF6P\_Suc8} = 0.8 \text{ mM}$    | Lunn and Rees (1990)         |
|                  |      | $K_{mUDPG\_Suc8} = 2.4 \text{ mM}$   | Lunn and Rees (1990)         |
|                  |      | $K_{e\_Suc8} = 10.0$                 | Lunn and Rees (1990)         |
| <b>3.1.3.24</b>  | Suc9 | $K_{mSuc\_Suc9} = 80.0 \text{ mM}$   | Cumino (2001)                |
|                  |      | $K_{mSucP\_Suc9} = 0.35 \text{ mM}$  | Whitaker (1984)              |
|                  |      | $K_{e\_Suc9} = 780.0$                | Zhu <i>et al.</i> (2007)     |

---

---

|                  |      |                                             |                                                    |
|------------------|------|---------------------------------------------|----------------------------------------------------|
| <b>2.7.1.105</b> | Suc3 | $K_{iADP\_Suc3} = 0.16 \text{ mM}$          | Kretschmer and Hofmann (1984)                      |
|                  |      | $K_{iDHAP\_Suc3} = 0.7 \text{ mM}$          | Markham and Kruger (2002)                          |
|                  |      | $K_{mATP\_Suc3} = 0.5 \text{ mM}$           | Walker and Huber (1987), Markham and Kruger (2002) |
|                  |      | $K_{mF26BP\_Suc3} = 0.021 \text{ mM}$       | Garcia de Frutos and Baanante (1995)               |
|                  |      | $K_{mF6P\_Suc3} = 0.5 \text{ mM}$           | Walker and Huber (1987), Markham and Kruger (2002) |
|                  |      | $K_{e\_Suc3} = 590.0$                       | Cornish-Bowden (1997)                              |
| <b>3.1.3.46</b>  | Suc4 | $K_{iF6P\_Suc4} = 0.1 \text{ mM}$           | Villadsen and Nielsen (2001)                       |
|                  |      | $K_{iPi\_Suc4} = 0.5 \text{ mM}$            | Villadsen and Nielsen (2001)                       |
|                  |      | $K_{mF26BP\_Suc4} = 0.032 \text{ mM}$       | Macdonald <i>et al.</i> (1989)                     |
| <b>5.3.1.9</b>   | Sta1 | $K_{e\_Sta1} = 2.3$                         | Bassham and Krause (1969)                          |
| <b>5.4.2.2</b>   | Sta2 | $K_{e\_Sta2} = 0.058$                       | Colowick and Sutherland (1942)                     |
| <b>2.7.7.27</b>  | Sta3 | $K_{aPGA\_Sta1} = 0.2252 \text{ mM}$        | Assumed                                            |
|                  |      | $K_{mG1P\_Sta3} = 0.038 \text{ mM}$         | Fuchs <i>et al.</i> (1979)                         |
|                  |      | $K_{mATP\_Sta3} = 0.12 \text{ mM}$          | Boehlein <i>et al.</i> (2005)                      |
|                  |      | $K_{iPi\_ATP\_Sta3} = 2.96 \text{ mM}$      | Boehlein <i>et al.</i> (2005)                      |
|                  |      | $K_{mPPi\_Sta3} = 0.033 \text{ mM}$         | Amir <i>et al.</i> (1972)                          |
|                  |      | $K_{iCPP1\_ATP\_Sta3} = 13.8E-4 \text{ mM}$ | Amir <i>et al.</i> (1972)                          |
|                  |      | $K_{mADPG\_Sta3} = 0.24 \text{ mM}$         | Sowokinos (1981)                                   |
|                  |      | $K_{iADP\_ATP\_Sta3} = 2.0 \text{ mM}$      | Ghosh <i>et al.</i> (1966)                         |
|                  |      | $K_{e\_Sta3} = 1.1$                         | Espada (1962)                                      |
| <b>3.6.1.1</b>   | Sta4 | $K_{mPPi\_Sta2} = 0.154 \text{ mM}$         | Van <i>et al.</i> (2005)                           |

---

---

|                   |         |                                    |                                   |
|-------------------|---------|------------------------------------|-----------------------------------|
|                   |         | $K_{e\_Sta2}=1.57 \text{ E-4 mM}$  | Flodgaard <i>et al.</i> (1974)    |
| <b>2.4.1.21</b>   | Sta5    | $K_{mADPG\_Sta3}=0.077 \text{ mM}$ | Hawker <i>et al.</i> (1974)       |
| <b>PGASink</b>    | PGAsink | $K_{mPGA\_PGASink}=2.4 \text{ mM}$ | Assumed, Zhu <i>et al.</i> (2007) |
| <b>4.1.1.39PR</b> | PR1     | $K_{mCO2\_PR1}=0.0162 \text{ mM}$  | Cousins <i>et al.</i> (2010)      |
|                   |         | $K_{mO2\_PR1}=0.222 \text{ mM}$    | Cousins <i>et al.</i> (2010)      |
|                   |         | $K_{mRuBP\_PR1}=0.02 \text{ mM}$   | Farquhar (1979)                   |
|                   |         | $K_{iPGA\_PR1}=2.52 \text{ mM}$    | Assumed Badger and Lorimer (1981) |
|                   |         | $K_{iFBP\_PR1}=0.04 \text{ mM}$    | Badger and Lorimer (1981)         |
|                   |         | $K_{iSBP\_PR1}=0.75 \text{ mM}$    | Badger and Lorimer (1981)         |
|                   |         | $K_{iPi\_PR1}=3.6 \text{ mM}$      | Assumed Badger and Lorimer (1981) |
|                   |         | $K_{iNADPH\_PR1}=0.21 \text{ mM}$  | Assumed Badger and Lorimer (1981) |
| <b>3.1.3.18</b>   | PR2     | $K_{mPGCA\_PR2}=0.026 \text{ mM}$  | Christeller and Tolbert (1978)    |
|                   |         | $K_{iPI\_PR2}=2.55 \text{ mM}$     | Christeller and Tolbert (1978)    |
|                   |         | $K_{iGCA\_PR2}=94.0 \text{ mM}$    | Christeller and Tolbert (1978)    |
| <b>1.1.3.15</b>   | PR3     | $K_{mGCA\_PR3}= 0.1 \text{ mM}$    | Tolbert (1981)                    |
| <b>2.6.1.4</b>    | PR4     | $K_{e\_PS4}= 607.0$                | Cooper and Meister (1972)         |
|                   |         | $K_{mGOA\_PS4}=0.15 \text{ mM}$    | Nakamura and Tolbert (1983)       |
|                   |         | $K_{mGLU\_PS4}= 1.7 \text{ mM}$    | Nakamura and Tolbert (1983)       |
|                   |         | $K_{iGLY\_PS4}=2.0 \text{ mM}$     | Zhu <i>et al.</i> (2007)          |
| <b>2.6.1.45</b>   | PR6     | $K_{e\_PR6}= 0.24$                 | Gynn (1982)                       |
|                   |         | $K_{mGOA\_PR6}=0.15 \text{ mM}$    | Nakamura and Tolbert (1983)       |
|                   |         | $K_{mSER\_PR6}=2.7 \text{ mM}$     | Nakamura and Tolbert (1983)       |
|                   |         | $K_{iGLY\_PR6}=33.0 \text{ mM}$    | Nakamura and Tolbert (1983)       |

---

---

|                                  |      |                                     |                                                       |
|----------------------------------|------|-------------------------------------|-------------------------------------------------------|
| <b>1.1.1.29</b>                  | PR7  | $K_{e\_PR7} = 2.5 \text{ E-}5$      | Guynn (1982), Zhu et al (2007)                        |
|                                  |      | $K_{iHPR\_PR7} = 12.0 \text{ mM}$   | Kleczkowski and Edwards (1989)                        |
|                                  |      | $K_{mHPR\_PR7} = 0.09 \text{ mM}$   | Kleczkowski and Edwards (1989)                        |
| <b>2.7.1.31</b>                  | PR8  | $K_{e\_PR8} = 300.0$                | Kleczkowski <i>et al.</i> (1985)                      |
|                                  |      | $K_{mATP\_PR8} = 0.21 \text{ mM}$   | Kleczkowski <i>et al.</i> (1985)                      |
|                                  |      | $K_{mGCEA\_PR8} = 0.25 \text{ mM}$  | Kleczkowski <i>et al.</i> (1985)                      |
|                                  |      | $K_{iPGA\_PR8} = 0.72 \text{ mM}$   | Assumed, Zhu <i>et al.</i> (2007)                     |
| <b>Gly_ser</b>                   | PR5  | $K_{mGLY\_PS5} = 6.0 \text{ mM}$    | Douce <i>et al.</i> (2001)                            |
|                                  |      | $K_{iSER\_PS5} = 4.0 \text{ mM}$    | Douce <i>et al.</i> (2001)                            |
| <b>Tgca</b>                      | PR9  | $K_{mGCA\_PR9} = 0.2 \text{ mM}$    | Howitz and McCarty (1985)                             |
|                                  |      | $K_{iGCEA\_PR9} = 0.22 \text{ mM}$  | Howitz and McCarty (1985)                             |
| <b>Tgcea</b>                     | PR10 | $K_{mGCEA\_PR10} = 0.39 \text{ mM}$ | Howitz and McCarty (1986)                             |
|                                  |      | $K_{iGCA\_PR10} = 0.28 \text{ mM}$  | Howitz and McCarty (1986)                             |
| <b>5.4.2.1&amp;4.2.1<br/>.11</b> | EX   | $K_{mPGA\_62} = 0.1 \text{ mM}$     | Laisk and Edwards (2000)                              |
|                                  |      | $K_{mPEP\_62} = 0.5 \text{ mM}$     | Laisk and Edwards (2000)                              |
|                                  |      | $K_{e\_62} = 0.4302$                | Laisk and Edwards (2000)                              |
| <b>3.6.3.14M</b>                 | ATPM | $K_{mADP\_ATPM} = 0.014 \text{ mM}$ | Davenport and Mccarty (1986)                          |
|                                  |      | $K_{mATP\_ATPM} = 0.11 \text{ mM}$  | Penefsky (1974)                                       |
|                                  |      | $K_{mPi\_ATPM} = 0.3 \text{ mM}$    | Aflalo and Shavit (1983)                              |
|                                  |      | $K_{e\_ATPM} = 5.734 \text{ mM-1}$  | Bassham and Krause (1969), Laisk <i>et al.</i> (1989) |
|                                  |      | $X = 0.667$                         | Assumed light partition coefficient                   |

---

---

|                                                   |        |                                                         |                                                                                        |
|---------------------------------------------------|--------|---------------------------------------------------------|----------------------------------------------------------------------------------------|
|                                                   |        | Y = 0.6                                                 | Assumed J <sub>max</sub> partition coefficient, von Caemmerer (2000) with modification |
|                                                   |        | F = 0.7225                                              | von Caemmerer (2000) F = abs(1-f)                                                      |
|                                                   |        | θ = 0.7                                                 | von Caemmerer (2000)                                                                   |
|                                                   |        | D = 1                                                   | von Caemmerer (2000) ATP/e- whole chain + Qcycle                                       |
| <b>3.6.3.14B</b>                                  | ATPB   | K <sub>mADP_ATPB</sub> = 0.014 mM                       | Davenport and Mccarty (1986)                                                           |
|                                                   |        | K <sub>mPi_ATPB</sub> = 0.11 mM                         | Penefsky (1974)                                                                        |
|                                                   |        | K <sub>mATP_ATPB</sub> = 0.3 mM                         | Aflalo and Shavit (1983)                                                               |
|                                                   |        | K <sub>e_ATPB</sub> = 5.734 mM <sup>-1</sup>            | Bassham and Krause (1969), Laisk et al. (1989)                                         |
|                                                   |        | G = 0.667                                               | von Caemmerer (2000) ATP/e-                                                            |
| <b>1.18.1.2M</b>                                  | NADPHM | K <sub>mNADP_NADPHM</sub> = 0.0072 mM                   | Shin (1972)                                                                            |
|                                                   |        | K <sub>mNADPH_NADPHM</sub> = 0.036 mM                   | Gozzer <i>et al.</i> (1977)                                                            |
|                                                   |        | K <sub>e_NADPHM</sub> = 502                             | Knaff (1996), Keirns (1972), Laisk and Edwards (2000)                                  |
|                                                   |        | E = 0.5                                                 | von Caemmerer (2000)                                                                   |
| <b>Metabolite transport through Plasmodesmata</b> | Leak   | D <sub>CO<sub>2</sub>_PD</sub> = 1.7 × 10 <sup>-9</sup> | Evans <i>et al.</i> (2009)                                                             |
|                                                   |        | l <sub>PD</sub> = 0.4 μm                                | von Caemmerer and Furbank (2003)                                                       |
|                                                   |        | S <sub>w</sub> /S <sub>i</sub> = 0.83                   | Sowinski <i>et al.</i> (2008)                                                          |
|                                                   |        | φ = 0.03                                                | Hatch and Osmond (1976); Stitt M, Heldt HW (1985b)                                     |
|                                                   | TMAL   | D <sub>MAL_PD</sub> = 6.67 × 10 <sup>-10</sup>          | Sowinski et al (2008)                                                                  |
|                                                   | TPYR   | D <sub>PYR_PD</sub> = 7.00 × 10 <sup>-10</sup>          | Sowinski et al (2008)                                                                  |

---

|                                                |           |                                      |                                                     |
|------------------------------------------------|-----------|--------------------------------------|-----------------------------------------------------|
|                                                | TPGA      | $D_{PGA\_PD}=5.25 \times 10^{-10}$   | Sowinski et al (2008)                               |
|                                                | TGAP      | $D_{GAP\_PD}=5.25 \times 10^{-10}$   | Sowinski et al (2008)                               |
|                                                | TDHAP     | $D_{DHAP\_PD}=5.25 \times 10^{-10}$  | Sowinski et al (2008)                               |
| <b>Leak_Bchl</b>                               | Leak_Bchl | $P_{CO2\_m}=0.002 \text{ cm s}^{-1}$ | Evans et al (2009)<br>Uehlein et al. (2008)         |
|                                                |           | $S_{Chl}/S_I=10$                     | Assumed                                             |
| <b>DiT1</b>                                    | TOAAM     | $K_{m\_OAA\_M}=0.053$                | Hatch <i>et al.</i> (1984)                          |
|                                                |           | $K_{imal\_OAA\_M}=7.5$               | Hatch <i>et al.</i> (1984)                          |
|                                                | TmalM     | $K_{m\_MAL\_M}=0.5$                  | Day and Hatch (1981)                                |
|                                                |           | $K_{iOAA\_MAL\_M}=0.3$               | Day and Hatch (1981)                                |
| <b>DiT2</b>                                    | TmalB     | $K_{m\_MAL\_B}=1$                    | Assumed, refer to parameters of DiT1                |
| <b>PPT</b>                                     | TPEPM     | $K_{m\_PEP\_M}=0.3$                  | Assumed                                             |
| <b>MEPM</b>                                    | TpyrM     | $K_{m\_PYR\_M}=0.05$                 | Assumed                                             |
| <b>MEPB</b>                                    | TpyrB     | $K_{m\_PYR\_B}=0.05$                 | Assumed                                             |
| <b>TPTM</b>                                    | TPGAM     | $K_{mPGA} = 2$                       | Assumed, Zhu <i>et al.</i> (2007) with modification |
|                                                | TGAPM     | $K_{mGAP} = 2$                       | Assumed, Zhu <i>et al.</i> (2007) with modification |
|                                                | TDHAPM    | $K_{mDHAP} = 2$                      | Assumed, Zhu <i>et al.</i> (2007) with modification |
| <b>TPTB</b>                                    | TPGAB     | $K_{mPGA} = 2$                       | Assumed, Zhu <i>et al.</i> (2007) with modification |
|                                                | TGAPB     | $K_{mGAP} = 2$                       | Assumed, Zhu <i>et al.</i> (2007) with modification |
|                                                | TDHAPB    | $K_{mDHAP} = 2$                      | Assumed, Zhu <i>et al.</i> (2007) with modification |
| <b>Carbon isotope (<math>^{13}CO_2</math>)</b> | Inf_h     | $\alpha_0=1.0044$                    | 16O'Leary (1984)                                    |
|                                                |           | $\alpha_1=1.0029$                    | Farquhar (1983)                                     |
|                                                | $v_1$     | $\alpha_2=0.991$                     | Emrich et al. (1970); Mook et al.                   |



|                          |                   |                                                                    |
|--------------------------|-------------------|--------------------------------------------------------------------|
| <b>calculation</b>       |                   | (1974)                                                             |
|                          | $\alpha_3=1.0011$ | Mook et al. (1974); O'Leary (1984)                                 |
| $V_{2\_h}$               | $\alpha_4=1.002$  | O'Leary <i>et al.</i> (1981)                                       |
| $V_{6\_h}$               | $\alpha_5=1.029$  | Roeske & O'Leary (1984)                                            |
| $V_{leak\_h}$            | $\alpha_6=1.0007$ | O'Leary (1984)                                                     |
| $R_{d\_h}, V_{pr\_5\_h}$ | $\Delta_i=4$      | Farquhar (1983) standard carbon isotope discrimination of C4 plant |

### 5.3 The volume of different compartments

| Compartments    | Parameters                            | Reference                                                                                                                                                                                              |
|-----------------|---------------------------------------|--------------------------------------------------------------------------------------------------------------------------------------------------------------------------------------------------------|
| MC cytosol      | $Vol_{Mcyto}=0.01 \text{ L m}^{-2}$   | Different cell type proportions were measured from Maize leaf cross section and subcellular volumes was determined by reference to the measurement result of Barley leaf (Winter <i>et al.</i> , 1993) |
| MC chloroplast  | $Vol_{Mchl}=0.02 \text{ L m}^{-2}$    |                                                                                                                                                                                                        |
| BSC cytosol     | $Vol_{Bcyto}=0.0045 \text{ L m}^{-2}$ |                                                                                                                                                                                                        |
| BSC chloroplast | $Vol_{Bchl}=0.009 \text{ L m}^{-2}$   |                                                                                                                                                                                                        |
| BSC peroxysome  | $Vol_{Bper}=0.00045 \text{ L m}^{-2}$ |                                                                                                                                                                                                        |

### 5.4 Initial value of metabolite concentrations

| Metabolite name  | Concentration | Compartment | Reference                    |
|------------------|---------------|-------------|------------------------------|
| CO <sub>2</sub>  | 0.004         | MC          | Jenkins <i>et al.</i> (1989) |
| HCO <sub>3</sub> | 0.077         | MC          | Jenkins <i>et al.</i> (1989) |
| OAA              | 0.1           | MC          | Assumed                      |
| PEP              | 2             | MC          | Stitt <i>et al.</i> (1985)   |
| Malate           | 35            | MC          | Stitt <i>et al.</i> (1985)   |
| Pyruvate         | 6             | MC          | Stitt <i>et al.</i> (1985)   |
| PGA              | 4             | MC          | Stitt <i>et al.</i> (1985)   |
| FBP              | 1.2           | MC          | Leegood (1985)               |
| UDPG             | 0.6           | MC          | Zhu <i>et al.</i> (2007)     |

---

|                       |        |      |                                                                                                                                     |
|-----------------------|--------|------|-------------------------------------------------------------------------------------------------------------------------------------|
| <b>SUCP</b>           | 0.0    | MC   | Assumed                                                                                                                             |
| <b>SUC</b>            | 0.0    | MC   | Assumed                                                                                                                             |
| <b>F26BP</b>          | 7.8E-6 | MC   | Zhu <i>et al.</i> (2007)                                                                                                            |
| <b>ATP</b>            | 0.35   | MC   | Zhu <i>et al.</i> (2007)                                                                                                            |
| <b>T3P</b>            | 11     | MC   | Stitt <i>et al.</i> (1985)                                                                                                          |
| <b>HexP</b>           | 5      | MC   | Leegood, (1985)                                                                                                                     |
| <b>Sucrose</b>        | 0.0    | MC   | Assumed                                                                                                                             |
| <b>OAA</b>            | 0.05   | Mchl | Assumed                                                                                                                             |
| <b>Malate</b>         | 35     | Mchl | Stitt <i>et al.</i> (1985)                                                                                                          |
| <b>PEP</b>            | 2      | Mchl | Stitt <i>et al.</i> (1985)                                                                                                          |
| <b>Pyruvate</b>       | 6      | Mchl | Stitt <i>et al.</i> (1985)                                                                                                          |
| <b>NADPH</b>          | 0.21   | Mchl | Zhu <i>et al.</i> (2007), Giersch <i>et al.</i> (1980), Woodrow and Mott (1993)                                                     |
| <b>ATP</b>            | 0.68   | Mchl | Zhu <i>et al.</i> (2007)                                                                                                            |
| <b>PGA</b>            | 4      | Mchl | Stitt <i>et al.</i> (1985)                                                                                                          |
| <b>T3P</b>            | 11     | Mchl | Stitt <i>et al.</i> (1985)                                                                                                          |
| <b>T3P</b>            | 1      | BSC  | Stitt <i>et al.</i> (1985)                                                                                                          |
| <b>PGA</b>            | 13     | BSC  | Stitt <i>et al.</i> (1985)                                                                                                          |
| <b>Malate</b>         | 17     | BSC  | Stitt <i>et al.</i> (1985)                                                                                                          |
| <b>Pyruvate</b>       | 5      | BSC  | Stitt <i>et al.</i> (1985)                                                                                                          |
| <b>CO<sub>2</sub></b> | 0.07   | BSC  | Jenkins <i>et al.</i> (1989)                                                                                                        |
| <b>CO<sub>2</sub></b> | 0.1    | Bchl | Assumed                                                                                                                             |
| <b>RuBP</b>           | 2.0    | Bchl | Zhu <i>et al.</i> (2007), Bassham and Krause (1969), Dietz and Heber (1984), Schimkat <i>et al.</i> (1990), Woodrow and Mott (1993) |
| <b>PGA</b>            | 13     | Bchl | Stitt <i>et al.</i> (1985)                                                                                                          |
| <b>ATP</b>            | 0.68   | Bchl | Zhu <i>et al.</i> (2007)                                                                                                            |
| <b>NADPH</b>          | 0.21   | Bchl | Zhu <i>et al.</i> (2007), Giersch <i>et al.</i>                                                                                     |

---

---

|                 |        |      |                                                                                                             |
|-----------------|--------|------|-------------------------------------------------------------------------------------------------------------|
|                 |        |      | (1980), Woodrow and Mott (1993)                                                                             |
| <b>SBP</b>      | 0.15   | Bchl | Zhu <i>et al.</i> (2007), Bassham and Krause (1969), Schimkat <i>et al.</i> (1990), Woodrow and Mott (1993) |
| <b>S7P</b>      | 0.25   | Bchl | Zhu <i>et al.</i> (2007), Bassham and Krause (1969), Woodrow and Mott (1993)                                |
| <b>FBP</b>      | 0.3    | Bchl | Leegood, (1985)                                                                                             |
| <b>E4P</b>      | 0.05   | Bchl | Bassham and Krause (1969), Woodrow and Mott (1993)                                                          |
| <b>Starch</b>   | 0      | Bchl | Assumed                                                                                                     |
| <b>T3P</b>      | 1      | Bchl | Stitt <i>et al.</i> (1985)                                                                                  |
| <b>HexP</b>     | 4      | Bchl | Leegood (1985)                                                                                              |
| <b>Pent</b>     | 0.05   | Bchl | Bassham and Krause (1969), Schimkat <i>et al.</i> (1990), Woodrow and Mott (1993)                           |
| <b>Malate</b>   | 17     | Bchl | Stitt <i>et al.</i> (1985)                                                                                  |
| <b>Pyruvate</b> | 5      | Bchl | Stitt <i>et al.</i> (1985)                                                                                  |
| <b>PGCA</b>     | 0.0029 | Bchl | Zhu <i>et al.</i> (2007)                                                                                    |
| <b>GCA</b>      | 0.36   | Bchl | Zhu <i>et al.</i> (2007)                                                                                    |
| <b>GCEA</b>     | 0.181  | Bchl | Zhu <i>et al.</i> (2007)                                                                                    |
| <b>PPi</b>      | 0      | Bchl | Assumed                                                                                                     |
| <b>ADPG</b>     | 0      | Bchl | Assumed                                                                                                     |
| <b>GCA</b>      | 0.36   | Bper | Zhu <i>et al.</i> (2007)                                                                                    |
| <b>GOA</b>      | 0.028  | Bper | Zhu <i>et al.</i> (2007)                                                                                    |
| <b>GLY</b>      | 1.8    | Bper | Zhu <i>et al.</i> (2007)                                                                                    |
| <b>SER</b>      | 7.5    | Bper | Zhu <i>et al.</i> (2007)                                                                                    |
| <b>HPR</b>      | 0.0035 | Bper | Zhu <i>et al.</i> (2007)                                                                                    |
| <b>GCEA</b>     | 0.1812 | Bper | Zhu <i>et al.</i> (2007)                                                                                    |

---

## 5.5 Molecular weight and catalytic number of the enzymes in photosynthetic carbon metabolism

| Enzyme Name                        | EC       | Molecular Weight (D) | Catalytic number1 (s <sup>-1</sup> ) | Reference                                                            |
|------------------------------------|----------|----------------------|--------------------------------------|----------------------------------------------------------------------|
| CA                                 | 4.2.1.1  | 160000               | 110000                               | Lazova <i>et al.</i> (2008)<br>Yu <i>et al.</i> (2007)               |
| PEPC                               | 4.1.1.31 | 110000               | 66                                   | Xu <i>et al.</i> (2006)                                              |
| NADP-MDH                           | 1.1.1.82 | 143000               | 1520                                 | Agostino <i>et al.</i> (1992)<br>Lemaire <i>et al.</i> (1996)        |
| NADP-ME                            | 1.1.1.40 | 226000               | 805.2                                | Detarsio <i>et al.</i> (2003)                                        |
| PPDK                               | 2.7.9.1  | 370000               | 144                                  | Sugiyama. 1973<br>McGuire <i>et al.</i> . (1996)                     |
| Rubisco                            | 4.1.1.39 | 532000               | 37.6                                 | Reger <i>et al.</i> (1983)<br>Cousins <i>et al.</i> (2010)           |
| PGA Kinase                         | 2.7.2.3  | 45000                | 540                                  | Fifis and Scopes (1978),<br>Bentahir <i>et al.</i> (2000)            |
| GAP Dehydrogenase                  | 1.2.1.12 | 180000               | 50                                   | Speranza and Ferri (1982)                                            |
| Aldolase                           | 4.1.2.13 | 143000               | 65                                   | Krueger and Sschnarrenberger (1983),<br>Moorhead and Pplaxton (1990) |
| FBPase                             | 3.1.3.11 | 160000               | 22.9                                 | Tang <i>et al.</i> (2000),<br>Reichert <i>et al.</i> (2000)          |
| Transketolase                      | 2.2.1.1  | 160000               | 69                                   | Nilsson <i>et al.</i> (1998)<br>Teige <i>et al.</i> (1989)           |
| SBPase                             | 3.1.3.37 | 66000                | 81                                   | Cadet <i>et al.</i> (1988), Cadet <i>et al.</i> (1987)               |
| PRK                                | 2.7.1.19 | 90000                | 615                                  | Surek <i>et al.</i> (1985), Porter <i>et al.</i> (1986)              |
| ADPG Pyrophospho-rylase            | 2.7.7.27 | 210000               | 546                                  | Kleczkowski <i>et al.</i> (1991), Li and Preiss (1992)               |
| Phosphoglycolate phosphatase       | 3.1.3.18 | 100000               | 292                                  | Kim <i>et al.</i> (2004), Kerr and Gear (1974)                       |
| Glycerate Kinase                   | 2.7.1.31 | 47000                | 200                                  | Kleczkowski <i>et al.</i> (1985), Kleczkowski and Randall (1988)     |
| Glycolalate oxidase                | 1.1.1.79 | 125000               | 437                                  | Kleczkowski <i>et al.</i> (1986), Zelitch (1955)                     |
| Serine Glyoxylate aminotransferase | 2.6.1.45 | 85000                | 97                                   | Ireland and Joy (1983), Paszkowski and                               |

---

|                                         |           |        |      |                                                                                   |
|-----------------------------------------|-----------|--------|------|-----------------------------------------------------------------------------------|
| Glycerate dehydrogenase                 | 1.1.1.29  | 90000  | 1629 | Niedzielsa (1990)<br>Julliard and Breton-Gilet (1997), Izumi <i>et al.</i> (1990) |
| Glutamate Glyoxylate aminotransferase   | 2.6.1.44  | 70800  | 54   | Paszkowski and Niedzielska (1989)                                                 |
| Glycine decarboxylase                   | 1.4.4.2   | 270000 | 18   | Hiraga and Kikuchi (1980), Kochi and Kikuchi (1974)                               |
| 6-phosphofructo-2-kinase                | 2.7.1.105 | 390000 | 9300 | Larondelle <i>et al.</i> 1986, Baez <i>et al.</i> (2003)                          |
| fructose-2,6-bisphosphate 2-phosphatase | 3.1.3.46  | 390000 | 1550 | Pilkis <i>et al.</i> (1987), Villadsen and Nielsen (2001),                        |
| UDP Glucose pyrophosphorylase           | 2.7.7.9   | 53000  | 400  | Gustafson and Gander (1972), Sowokinos <i>et al.</i> (1993)                       |
| Sucrose phosphate synthase              | 2.4.1.14  | 480000 | 640  | Sonnewald <i>et al.</i> (1993)                                                    |
| Sucrose phosphatase                     | 3.1.3.24  | 120000 | 2500 | Echeverria and Salerno (1994), Lunn <i>et al.</i> (2000)                          |

---

## 6 Additional explanations

### 6.2 Rationale underlying the choice of the default CO<sub>2</sub> permeability coefficient

The value of CO<sub>2</sub> chloroplast membrane permeability ( $P_{CO_2\_Chl}$ ), which we used in the model, was considered to be too low for C3 plant and would lead to a negative photosynthesis below 150 ubar (Tholen and Zhu, 2011). While in the C4 system,  $P_{CO_2\_Chl}$  exhibited the opposite effect on A (Fig. S9), because increased the CO<sub>2</sub> chloroplast membrane permeability increased leakiness and decreased the CO<sub>2</sub> concentration around rubisco in BSC chloroplast, thus photorespiration enhanced and photosynthesis reduced. The influence of  $P_{CO_2\_Chl}$  on A in our C4 model was less conspicuous than that performed in C3 photosynthesis model.

### 6.1 Rationale underlying the choice of the rate equation used to calculate CO<sub>2</sub> uptake rates

The CO<sub>2</sub> assimilation rate ( $A$ ) was calculated as:

$$A = v_c - 0.5v_o - R_d \quad (18)$$

where  $v_c$  and  $v_o$  are the rates of RuBP carboxylation and oxygenation respectively.  $R_d$  is the rate of mitochondrial respiration. The default value for  $R_d$  is 1  $\mu\text{mol m}^{-2} \text{s}^{-1}$  with the rate of respiration in both BSC ( $R_b$ ) and MC ( $R_m$ ) being equal as 0.5  $\mu\text{mol m}^{-2} \text{s}^{-1}$ . This equation predicts the same photosynthetic CO<sub>2</sub> uptake rate.

In von Caemmerer's C4 model (von Caemmerer, 2000), CO<sub>2</sub> assimilation was calculated by two equations, besides Eqn. 18, the following equation was also used:

$$A = v_p - v_{Leak} - R_m \quad (19)$$

The minimal of Eqn. 18 and 19 determines the actual  $A$ . While in our model, both calculation methods always reach the same result. Because when we calculated  $A$  using the ODE model, all metabolite levels were in steady state, i.e. there is no changes of metabolite levels with time. Therefore,

$$\frac{d[CO_2]_{Bchl}}{dt} = (v_{ME} - v_c - v_{leak\_Bchl}) \cdot \frac{1}{Vol_{Bchl}} = 0 \quad (S1)$$

$$\frac{d[CO_2]_{BSC}}{dt} = (v_{leak\_Bchl} + v_{PR5} + R_b - v_{leak}) \cdot \frac{1}{Vol_{Bcyto}} = 0 \quad (S2)$$

Eqn. (18) and (19) can be written as:

$$v_{ME} = v_c + v_{leak\_Bchl} \quad (S3)$$

$$v_{leak\_Bchl} = v_{leak} - v_{PR5} - R_b \quad (S4)$$

Because at the steady state, one RuBP oxygenation lead to release of 0.5 CO<sub>2</sub> in the photorespiratory process, i.e.:

$$v_{PR5} = 0.5 \cdot v_o \quad (S5)$$

In C4 shuttle, since at steady state, no metabolite accumulates, CO<sub>2</sub> fixed by PEPC was equal to CO<sub>2</sub> released by NADP-ME:

$$v_p = v_{ME} \quad (S6)$$

Therefore, Eqn. (19) can be re-written as:

$$A = v_p - v_{Leak} - R_m = v_c + v_{leak} - 0.5 \cdot v_o - R_b - v_{Leak} - R_m = v_c - 0.5 \cdot v_o - R_d$$

## 7 Reference

- Aflalo C, Shavit N** (1983) Steadystate kinetics of photophosphorylation: limited access of nucleotides to the active site on the ATP synthetase. *FEBS Lett.* 154: 1 75-79
- Agostino A, Jeffrey P, Hatch MD** (1992) Amino Acid Sequence and Molecular Weight of Native NADP Malate Dehydrogenase from the C(4) Plant *Zea mays*. *Plant Physiol* 98: 1506-1510
- Albe KR** (1991) Partial purification and kinetic characterization of transaldolase from *Dictyostelium discoideum*. *Exp Mycol* 15:255–62
- Amir J, Cherry JH** (1972) Purification and properties of adenosine diphosphoglucose pyrophosphorylase from sweet corn. *Plant Physiol* 49: 893-897
- Baalmann E, Backhausen JE, Rak C, Vetter S, Scheibe R** (1995) Reductive modification and nonreductive activation of purified spinach chloroplast NADP-dependent glyceraldehyde-3-phosphate dehydrogenase. *Arch Biochem Biophys* 324: 201-208
- Badger MR, Lorimer GH** (1981) Interaction of sugar phosphates with the catalytic site of ribulose-1,5-bisphosphate carboxylase. *Biochemistry-U.S.* 20: 2219-2225
- Baez M, Rodriguez PH, Babul J, Guixe V** (2003) Structural and functional roles of Cys-238 and Cys-295 in *Escherichia coli* phosphofructokinase-2. *Biochem J* 376: 277-283
- Bassham JA, Krause GH** (1969) Free energy changes and metabolic regulation in steady-state photosynthetic carbon reduction. *Biochim Biophys Acta* 189: 207-221
- Bentahir M, Feller G, Aittaleb M, Lamotte-Brasseur J, Himri T, Chessa JP, Gerday C** (2000) Structural, kinetic, and calorimetric characterization of the cold-active phosphoglycerate kinase from the antarctic *Pseudomonas* sp. TACII18. *J Biol Chem* 275: 11147-11153
- Brooks K, Criddle RS** (1966) Enzymes of the carbon cycle of photosynthesis. I. Isolation and properties of spinach chloroplast aldolase. *Arch Biochem Biophys* 117:650–659
- Boehlein SK, Sewell AK, Cross J, Stewart JD, Hannah LC** (2005) Purification and characterization of adenosine diphosphate glucose pyrophosphorylase from maize/potato mosaics. *Plant Physiol* 138: 1552-1562
- Cadet F, Meunier JC** (1988) pH and kinetic studies of chloroplast sedoheptulose-1,7 -bisphosphatase from spinach (*Spinacia oleracea*). *Biochem J* 253: 249-254



**Cadet F, Meunier JC, Ferte N** (1987) Isolation and purification of chloroplastic spinach (*Spinacia oleracea*) sedoheptulose-1,7-bisphosphatase. *Biochem J* 241: 71-74

**Charles SA, Halliwell B** (1981) Light activation of fructose bisphosphatase in photosynthetically competent pea chloroplasts. *Biochem J* 200: 357-363

**Christeller JT, Tolbert NE** (1978) Phosphoglycolate phosphatase. Purification and properties. *J Biol Chem* 253: 1780-1785

**Colowick SP, Sutherland EW** (1942) Polysaccharide synthesis from glucose by means of purified enzymes. *J Biol Chem* 144: 423-437

**Cooper JL, Meister A** (1972) Isolation and properties of highly purified glutamine transaminase. *Biochemistry-U S A* 11: 661-671

**Cousins AB, Ghannoum O, Von Caemmerer S, Badger MR** (2010) Simultaneous determination of Rubisco carboxylase and oxygenase kinetic parameters in *Triticum aestivum* and *Zea mays* using membrane inlet mass spectrometry. *Plant Cell Environ* 33: 444-452

**Cumino A, Ekeröth C, Salerno GL** (2001) Sucrose-phosphate phosphatase from *Anabaena* sp. strain PCC 7120: isolation of the protein and gene revealed significant structural differences from the higher-plant enzyme. *Planta* 214: 250-256

**Datta AG, Racker E** (1961) Mechanism of action of transketolase. I. Properties of the crystalline yeast enzyme. *J Biol Chem* 236: 617-623

**Davenport JW, McCarty RE** (1986) Relationships between rates of steady-state ATP synthesis and the magnitude of the proton activity gradient across thylakoid membranes. *Biochim Biophys Acta* 851: 136-145

**Day DA, Hatch MD** (1981) Dicarboxylate Transport in Maize Mesophyll Chloroplasts. *Arch Biochem Biophys* 211: 738-742

**Detarsio E, Wheeler MC, Campos Bermudez VA, Andreo CS, Drincovich MF** (2003) Maize C4 NADP-malic enzyme. Expression in *Escherichia coli* and characterization of site-directed mutants at the putative nucleoside-binding sites. *J Biol Chem* 278: 13757-13764

**Dietz KJ, Heber U** (1984) Rate-limiting factors in leaf photosynthesis. 1. Carbon fluxes in the Calvin cycle. *Biochim Biophys Acta* 767: 432-443

**Douce R, Bourguignon J, Neuburger M, Rebeille F** (2001) The glycine decarboxylase system: a fascinating complex. *Trends Plant Sci* 6: 167-176

- Echeverria E, Salerno G** (1994) Properties of sucrose-phosphate phosphatase from rice (*Oryza sativa*) leaves. *Plant Sci.* 96, 15-19
- Emrich K, Ehhalt DH, Vogel JC** (1970) Carbon isotope fractionation during the precipitation of calcium carbonate. *Earth Planet. Sci. Lett.* 8:363-71
- Espada J** (1962) Enzymic synthesis of adenosine diphosphate glucose from glucose-1-phosphate and adenosine triphosphate. *J Biol Chem* 237:3577-3581
- Evans JR, Kaldenhoff R, Genty B, Terashima I** (2009) Resistances along the CO<sub>2</sub> diffusion pathway inside leaves. *J Exp Bot* 60: 2235-2248
- Farquhar GD** (1979) Models describing the kinetics of ribulose biphosphate carboxylase-oxygenase. *Arch Biochem Biophys* 193: 456-468
- Farquhar GD** (1983) On the nature of carbon isotope discrimination in C<sub>4</sub> species. *Aust. J. Plant Physiol.* 10:205-26
- Farquhar GD, Ehleringer JR, Hubick KT** (1989) Carbon Isotope Discrimination and Photosynthesis. *Annu Rev Plant Phys.* 40:503-537.
- Felle H, Bertl A** (1986) The Fabrication Of H<sup>+</sup>-Selective Liquid-Membrane Microelectrodes for Use In Plant-Cells. *J Exp Bot* 37: 1416-1428
- Ferri G, Comerio G, Iadarola P, Zapponi MC, Speranza ML** (1978) Subunit structure and activity of glyceraldehyde-3-phosphate dehydrogenase from spinach chloroplasts. *Biochim Biophys Acta* 522: 19-31
- Fifis T, Scopes RK** (1978) Purification of 3-phosphoglycerate kinase from diverse sources by affinity elution chromatography. *Biochem J* 175: 311-319
- Flodgaard H, Fleron P** (1974) Thermodynamic parameters for the hydrolysis of inorganic pyrophosphate at pH 7.4 as a function of (Mg<sup>2+</sup>), (K<sup>+</sup>), and ionic strength determined from equilibrium studies of the reaction. *J Biol Chem* 249: 3465-3474
- Fuchs RL, Smith JD** (1979) The purification and characterization of ADP-glucose pyrophosphorylase A from developing maize seeds. *Biochim Biophys Acta* 566: 40-48
- Gao Y, Woo KC** (1996) Regulation of phosphoenolpyruvate carboxylase in *Zea mays* by protein phosphorylation and metabolites and their roles in photosynthesis. *Aust J Plant Physiol* 23: 25-32
- Garcia de Frutos P, Baanante IV** (1995) The muscle isoform of 6-phosphofructo 2-kinase/fructose 2,6-bisphosphatase of the teleost *Sparus aurata*: relationship with the liver isoform. *Arch. Biochem. Biophys.* 321: 297–302

**Gardemann A** (1983) Control of CO<sub>2</sub> fixation: regulation of spinach ribulose-5-phosphate kinase by stromal metabolite levels. *Biochim Biophys Acta* 722, 51–60

**Ghosh HP, Preiss J** (1966) Adenosine diphosphate glucose pyrophosphorylase. A regulatory enzyme in the biosynthesis of starch in spinach leaf chloroplasts. *J Biol Chem* 241: 4491-4504

**Giersch C, Heber U, Kaiser G, Walker DA, Robinson SP** (1980a) Intracellular metabolite gradients and flow of carbon during photosynthesis of leaf protoplasts. *Arch Biochem Biophys* 205: 246-259

**Giersch C, Heber U, Kobayashi Y, Inoue Y, Shibata K, Heldt HW** (1980b) Energy charge, phosphorylation potential and proton motive force in chloroplasts. *Biochim Biophys Acta* 590: 59-73

**Gozzer C, Zanetti G, Galliano M, Sacchi GA, Minchiotti L, Curti B** (1977) Molecular heterogeneity of ferredoxin-NADP<sup>+</sup> reductase from spinach leaves. *Biochim Biophys Acta* 485: 278-290

**Gustafson GL, Gander JE** (1972) Uridine diphosphate glucose pyrophosphorylase from *Sorghum vulgare*. Purification and kinetic properties. *J Biol Chem* 247: 1387-1397

**Hansen RG, Albrecht GJ, Bass ST, Seifert LL** (1966) *Methods Enzymol.*; 8, 248

**Harary I, Korey SR, Ochoa S** (1953) Biosynthesis of dicarboxylic acids by carbon dioxide fixation. VII. Equilibrium of malic enzyme reaction. *J Biol Chem* 203: 595-604

**Harbron S, Foyer C, Walker D** (1981) The purification and properties of sucrose-phosphate synthetase from spinach leaves: the involvement of this enzyme and fructose biphosphatase in the regulation of sucrose biosynthesis. *Arch Biochem Biophys* 212: 237-246

**Hatch, M. and Osmond, C.B.** (1976) in *Encyclopedia of Plant Physiology* (Stocking, C.R. and Heber, U., eds.), Vol. 3, pp. 144-184. Springer-Verlag. Berlin

**Hatch MD** (1987) C-4 Photosynthesis - a Unique Blend of Modified Biochemistry, Anatomy and Ultrastructure. *Biochim Biophys Acta* 895: 81-106

**Hatch MD, Burnell JN** (1990) Carbonic-Anhydrase Activity in Leaves and Its Role in the First Step of C-4 Photosynthesis. *Plant Physiol* 93: 825-828

**Hatch MD, Droscher L, Flugge UI, Heldt HW** (1984) A Specific Translocator for Oxaloacetate Transport in Chloroplasts. *Febs Lett* 178: 15-19

**Hawker JS, Ozbun JL, Ozaki H, Greenberg E, Preiss J** (1974) Interaction of spinach leaf adenosine diphosphate glucose alpha-1,4-glucan alpha-4-glucosyl transferase and alpha-1,4-glucan, alpha-1,4-glucan-6-glycosyl transferase in synthesis of branched alpha-glucan. *Arch Biochem Biophys* 160: 530-551

**Hiraga K, Kikuchi G** (1980) The mitochondrial glycine cleavage system. Purification and properties of glycine decarboxylase from chicken liver mitochondria. *J Biol Chem* 255: 11664-11670

**Hoofd LJC, Tong RR, Stroeve P** (1986) Nonequilibrium Facilitated Transport Of Carbon-Dioxide In Bicarbonate And Bovine Albumin Solutions. *Ann Biomed Eng* 14: 493-511

**Howitz KT, McCarty RE** (1985a) Kinetic characteristics of the chloroplast envelope glycolate transporter. *Biochemistry* 24:2645-52

**Howitz KT, McCarty RE** (1985b) Substrate specificity of the pea chloroplast glycolate transporter. *Biochemistry* 24: 3645-3650

**Howitz KT, McCarty RE** (1986) D-Glycerate transport by the pea chloroplast glycolate carrier. Studies on [1-<sup>14</sup>C]D-glycerate uptake and D-glycerate dependent O<sub>2</sub> evolution. *Plant Physiol* 80: 390-395

**Ireland RJ, Joy KW** (1983) Purification and properties of an asparagine aminotransferase from *Pisum sativum* leaves. *Archives of Biochemistry and Biophysics*, 223, 291-296

**Iwaki T, Wadano A, Yokota A, Himeno M** (1991) Aldolase - an important enzyme in controlling the ribulose-1,5-bisphosphate regeneration rate in photosynthesis. *Plant Cell Physiol*. 32, 1083-1091

**Jang HK, Lee SW, Lee YH, Hahn TR** (2003) Purification and characterization of a recombinant pea cytoplasmic fructose-1,6-bisphosphatase. *Protein Expr Purif* 28: 42-48

**Jenkins CL, Burnell JN, Hatch MD** (1987) Form of inorganic carbon involved as a product and as an inhibitor of c(4) Acid decarboxylases operating in c(4) photosynthesis. *Plant Physiol* 85: 952-957

**Jenkins CL Hatch MD** (1985) Properties and reaction mechanism of C<sub>4</sub> leaf pyruvate, Pi dikinase. *Arch Biochem Biophys* 239: 53-62

**Jenkins CL, Furbank RT, Hatch MD.** (1989) Mechanism of C<sub>4</sub> Photosynthesis - a Model Describing the Inorganic Carbon Pool in Bundle Sheath-Cells. *Plant Physiol* 91: 1372-1381

**Julliard JH, Breton-Gilet A** (1997) Identification of hydroxypyruvate reductase from parsley by peptide sequence comparison after a two-step purification. *Protein Expr Purif* 9: 10-14

**Kagawa T, Bruno PL** (1988) NADP-malate dehydrogenase from leaves of *Zea mays*: purification and physical, chemical, and kinetic properties. *Arch Biochem Biophys* 260: 674-695

**Keirns JJ, Wang JH** (1972) Studies on nicotinamide adenine dinucleotide phosphate reductase of spinach chloroplasts. *J Biol Chem* 247: 7374-7382

**Kerr MW, Gear CF** (1974) Phosphoglycolate phosphatase isolated from pea leaves. *Biochem. Soc. Trans.* 2, 338-340

- Kim Y, Yakunin AF, Kuznetsova E, Xu X, Pennycooke M, Gu J, Cheung F, Proudfoot M, Arrowsmith CH, Joachimiak A, Edwards AM, Christendat D** (2004) Structure- and function-based characterization of a new phosphoglycolate phosphatase from *Thermoplasma acidophilum*. *J Biol Chem* 279: 517-526
- Kleczkowski LA, Edwards GE** (1989) Identification of hydroxypyruvate and glyoxylate reductases in maize leaves. *Plant Physiol* 91: 278-286
- Kleczkowski LA, Randall DD** (1988) Purification and characterization of a novel NADPH(NADH)-dependent hydroxypyruvate reductase from spinach leaves. Comparison of immunological properties of leaf hydroxypyruvate reductases. *Biochem J* 250: 145-152
- Kleczkowski LA, Randall DD, Blevins DG** (1986) Purification and characterization of a novel NADPH(NADH)-dependent glyoxylate reductase from spinach leaves. Comparison of immunological properties of leaf glyoxylate reductase and hydroxypyruvate reductase. *Biochem J* 239: 653-659
- Kleczkowski LA, Randall DD, Zahler WL** (1985) The substrate specificity, kinetics, and mechanism of glycerate-3-kinase from spinach leaves. *Arch Biochem Biophys* 236: 185-194
- Kleczkowski, L. A., Volland, P., Lonneborg, A., Olsen, O. A. and Luthi, E. (1991). Plant ADP-glucose pyrophosphorylase--recent advances and biotechnological perspectives (a review). *Z Naturforsch C* 46: 605-612
- Knaff DB** (1996) Ferredoxin and ferredoxin-dependent enzymes. In DR Ort and CF Yocum, eds, *Oxygenic Photosynthesis: The Light Reactions*. Kluwer Academic Publishers, Dordrecht, The Netherlands, pp 333-361
- Kochi H, Kikuchi G** (1974) Mechanism of the reversible glycine cleavage reaction in *Arthrobacter globiformis*. I. Purification and function of protein components required for the reaction. *J Biochem* 75: 1113-1127
- Kanai R, Edwards GE** (1999) The Biochemistry of C4 Photosynthesis. In RF Sage, RK Monson, eds, *C4 Plant Biology*. Academic Press, Toronto, pp 173-211.
- Kretschmer M, Hofmann E** (1984) Inhibition of rat liver phosphofructokinase-2 by phosphoenolpyruvate and ADP. *Biochem Biophys Res Commun* 124: 793-796
- Kruger I, Schnarrenberger C** (1983) Purification, subunit structure and immunological comparison of fructose-bisphosphate aldolases from spinach and corn leaves. *Eur J Biochem* 136: 101-106
- Laisk A, Eichelmann H, Oja V, Eatherall A, Walker DA** (1989) A mathematical model of the carbon

metabolism in photosynthesis. Difficulties in explaining oscillations by fructose 2,6-bisphosphate regulation. *Proc R Soc Lond B Biol Sci* 237: 389–415

**Laisk A, Edwards GE** (2000) A mathematical model of C-4 photosynthesis: The mechanism of concentrating CO<sub>2</sub> in NADP-malic enzyme type species. *Photosynth Res* 66: 199-224

**Larondelle Y, Mertens E, Van Schaftingen E, Hers HG** (1986) Purification and properties of spinach leaf phosphofructokinase 2/fructose 2,6-bisphosphatase. *Eur J Biochem* 161: 351-357

**Lawson JWR, Guynn RW, Cornell N, Veech RL** (1976) in "Gluconeogenesis: Its Regulation in Mammalian Species"; R.W. Hanson and M.A. Mehlman, eds.; John Wiley and Sons, New York. pp. 481-512.

**Lazova GN, Stemler AJ** (2008) A 160 kDa protein with carbonic anhydrase activity is complexed with rubisco on the outer surface of thylakoids. *Cell Biol Int* 32: 646-653

**Leegood RC** (1985) The Intercellular Compartmentation of Metabolites in Leaves of Zea-Mays-L. *Planta* 164: 163-171

**Lemaire M, Miginiac-Maslow M, Decottignies P** (1996) The catalytic site of chloroplastic NADP-dependent malate dehydrogenase contains a His/Asp pair. *Eur J Biochem* 236: 947-952

**Li L, Preiss J** (1992) Characterization of ADPglucose pyrophosphorylase from a starch-deficient mutant of *Arabidopsis thaliana*(L). *Carbohydr Res* 227: 227-239

**Lunn JE, ap Rees T** (1990) Apparent equilibrium constant and mass-action ratio for sucrose-phosphate synthase in seeds of *Pisum sativum*. *Biochem J* 267: 739-743

**Lunn JE, Ashton AR, Hatch MD, Heldt HW** (2000) Purification, molecular cloning, and sequence analysis of sucrose-6P-phosphate phosphohydrolase from plants. *Proc Natl Acad Sci U S A* 97: 12914-12919

**Macdonald FD, Chou Q, Buchanan BB, Stitt M** (1989) Purification and characterization of fructose-2,6-bisphosphatase, a substrate-specific cytosolic enzyme from leaves. *J Biol Chem* 264: 5540-5544

**Macioszek J, Anderson LE** (1987) Changing kinetic properties of the two enzymes phosphoglycerate kinase/NADP-linked glyceraldehyde-3-phosphate dehydrogenase couple from pea chloroplasts during photosynthetic induction. *Biochem. Biophys. Acta* 892:185–190.

**Markham JE, Kruger NJ** (2002) Kinetic properties of bifunctional 6-phosphofructo-2-kinase/fructose-2,6-bisphosphatase from spinach leaves. *Eur J Biochem* 269: 1267-1277

**McGuire M, Carroll LJ, Yankie L, Thrall SH, DunawayMariano D, Herzberg O, Jayaram B, Haley BH** (1996) Determination of the nucleotide binding site within *Clostridium symbiosum* pyruvate phosphate dikinase by photoaffinity labeling, site-directed mutagenesis, and structural analysis. *Biochemistry-U.S.* 35: 8544-8552

**Mook WG, Bommerson JC, Staverman WH** (1974) Carbon isotope fractionations between dissolved bicarbonate and gaseous carbon dioxide. *Earth Planet Sci. Lett.* 22:169-76

**Moorhead GB, Plaxton WC** (1990) Purification and characterization of cytosolic aldolase from carrot storage root. *Biochem J* 269: 133-139

**Mukerji, SK** (1977) Corn Leaf Phosphoenolpyruvate Carboxylases - Purification And Properties Of 2 Isoenzymes. *Arch Biochem Biophys* 182: 343-351

**Nakamura, Y, Tolbert, NE** (1983) Serine: glyoxylate, alanine:glyoxylate, and glutamate:glyoxylate aminotransferase reactions in peroxisomes from spinach leaves. *J Biol Chem* 258: 7631-7638

**Nakano K, Omura Y, Tagaya M, Fukui T** (1989) UDP-glucose pyrophosphorylase from potato tuber: purification and characterization. *J Biochem* 106: 528-532

**Nilsson U, Hecquet L, Gefflaut T, Guerard C, Schneider G** (1998) Asp477 is a determinant of the enantioselectivity in yeast transketolase. *Febs Lett* 424: 49-52

**O'Leary MH, Reife JE, Slater JD** (1981) Kinetic and isotope effect studies of maize phosphoenolpyruvate carboxylase. *Biochemistry* 20:73 08--14

**O'Leary MH** (1984) Measurement of the isotopic fractionation associated with diffusion of carbon dioxide in aqueous solution. *J. Phys. Chem.* 88:823-25

**Omnaas J, Porter MA, Hartman FC** (1985) Evidence for a reactive cysteine at the nucleotide binding site of spinach ribulose-5-phosphate kinase. *Arch Biochem Biophys* 236: 646-653

**Paszkowski A, Niedzielska A** (1989) Glutamate:glyoxylate aminotransferase from the seedlings of rye (*Secale cereale* L.). *Acta biochimica Polonica* 36: 17-29

**Paszkowski, A, Niedzielska A** (1990) Serine:glyoxylate aminotransferase from the seedlings of rye (*Secale cereale* L.). *Acta biochimica Polonica* 37: 277-282

**Penefsky HS** (1974) Mitochondrial and chloroplast ATPases. In Boyer, PD (ed.) *The Enzymes*. Academic Press, New York, pp. 375-395.

**Pocker Y, Miksch RR** (1978) Plant Carbonic-Anhydrase - Properties And Bicarbonate Dehydration Kinetics. *Biochemistry-U.S.* 17: 1119-1125

- Porter MA, Milanez S, Stringer CD, Hartman FC** (1986) Purification and characterization of ribulose-5-phosphate kinase from spinach. *Arch Biochem Biophys* 245: 14-23
- Reger BJ, Ku MSB, Potter JW, Evans JJ** (1983) Purification and Characterization of Maize Ribulose-1,5-Bisphosphate Carboxylase. *Phytochemistry* 22: 1127-1132
- Reichert A, Baalman E, Vetter S, Backhausen JE, Scheibe R** (2000) Activation properties of the redox-modulated chloroplast enzymes glyceraldehyde 3-phosphate dehydrogenase and fructose-1,6-bisphosphatase. *Physiol. Plant.* 110, 330-341
- Roeske CA, O'leary MH** (1984) Carbon isotope effects on the enzymecatalyzed carboxylation of ribulose bisphosphate. *Biochemistry* 23:6275-84
- Salerno GL, Pontis HG** (1978) Studies on sucrose phosphate synthetase. The inhibitory action of sucrose. *Febs Lett* 86: 263-267
- Schenk G, Duggleby RG, Nixon PF** (1998) Properties and functions of the thiamin diphosphate dependent enzyme transketolase. *The international journal of biochemistry & cell biology* 30: 1297-1318
- Schimkat D, Heineke D, Heldt HW** (1990) Regulation of sedoheptulose-1,7-bisphosphatase by sedoheptulose-7-phosphate and glycerate, and of fructose-1,6-bisphosphatase by glycerate in spinach chloroplasts. *Planta* 181: 97-103
- Schnarrenberger C, Kruger I** (1986) Distinction between Cytosol and Chloroplast Fructose -Bisphosphate Aldolases from Pea, Wheat, and Corn Leaves. *Plant Physiol* 80: 301-304
- Slabas AR, Walker DA** (1976) Inhibition of spinach phosphoribulokinase by DL-glyceraldehyde. *Biochem J* 153: 613-619
- Shin M** (1972) Ferredoxin-NADPH reductase from spinach. *Methods Enzymol.* 23:440-445.
- Sonnewald U, Quick WP, MacRae E, Krause KP, Stitt M** (1993) Purification, cloning and expression of spinach leaf sucrose-phosphate synthase in *Escherichia coli*. *Planta* 189: 174-181
- Sowinski P, Szczepanik J, Minchin PEH** (2008) On the mechanism of C-4 photosynthesis intermediate exchange between Kranz mesophyll and bundle sheath cells in grasses. *J Exp Bot* 59: 1137-1147
- Sowokinos JR** (1981) Pyrophosphorylases in *Solanum tuberosum*: II. CATALYTIC PROPERTIES AND REGULATION OF ADP-GLUCOSE AND UDP-GLUCOSE PYROPHOSPHORYLASE ACTIVITIES IN POTATOES. *Plant Physiol* 68: 924-929
- Sowokinos JR, Spsychalla JP, Desborough SL** (1993) Pyrophosphorylases in *Solanum tuberosum* (IV. Purification, Tissue Localization, and Physicochemical Properties of UDP-Glucose Pyrophosphorylase).



Plant Physiol 101: 1073-1080

**Sparla F, Fermani S, Falini G, Zaffagnini M, Ripamonti A, Sabatino P, Pupillo P, Trost P** (2004) Coenzyme site-directed mutants of photosynthetic A4-GAPDH show selectively reduced NADPH-dependent catalysis, similar to regulatory AB-GAPDH inhibited by oxidized thioredoxin. *J Mol Biol* 340: 1025-1037

**Sparla F, Zaffagnini M, Wedel N, Scheibe R, Pupillo P, Trost P** (2005) Regulation of photosynthetic GAPDH dissected by mutants. *Plant Physiol* 138: 2210-2219

**Speranza ML, Ferri G** (1982) Glyceraldehyde-3-phosphate dehydrogenase (glycolytic form) from spinach leaves. *Methods Enzymol.* 89, 316-319

**Sprenger GA, Schorken U, Sprenger G, Sahm H** (1995) Transketolase A of *Escherichia coli* K12. Purification and properties of the enzyme from recombinant strains. *Eur J Biochem* 230: 525-532

**Stitt M, Heldt HW** (1985) Generation and Maintenance of Concentration Gradients between the Mesophyll and Bundle Sheath in Maize Leaves. *Biochim Biophys Acta* 808: 400-414

**Surek B, Heilbron A, Austen A, Latzko E** (1985) Purification and characterization of phosphoribulokinase from wheat leaves. *Planta* 165: 507-512

**Tang GL, Wang YF, Bao JS, Chen HB** (2000) Overexpression in *Escherichia coli* and characterization of the chloroplast fructose-1,6-bisphosphatase from wheat. *Protein Expr Purif* 19: 411-418

**Teige M, Melzer M, Suss KH** (1989). Purification, properties and in situ localization of the amphibolic enzymes D-ribulose 5-phosphate 3-epimerase and transketolase from spinach chloroplasts. *Eur. J. Biochem.* 252, 237-244

**Tolbert NE** (1981) Metabolic pathways in peroxisomes and glyoxysomes. *Annu Rev Biochem* 50: 133-157

**Trost P, Scagliarini S, Valenti V, Pupillo P** (1993) Activation of spinach chloroplast glyceraldehyde 3-phosphate dehydrogenase: Effect of glycerate 1,3-bisphosphate. *Planta* 190: 320–326

**Uchida K, Mochizuki M, Niizeki K** (1983) Diffusion-Coefficients Of Co<sub>2</sub> Molecule And Bicarbonate Ion In Hemoglobin Solution Measured by Fluorescence Technique. *Jpn J Physiol* 33: 619-634

**Uedan, K, Sugiyama T** (1976) Purification And Characterization Of Phosphoenolpyruvate Carboxylase From Maize Leaves. *Plant Physiol* 57: 906-910

**Uehlein N, Otto B, Hanson DT, Fischer M, McDowell N, Kaldenhoff R** (2008) Function of *Nicotiana tabacum* aquaporins as chloroplast gas pores challenges the concept of membrane CO<sub>2</sub> permeability. *Plant*

Cell 20: 648-657

**Van RC, Pan YJ, Hsu SH, Huang YT, Hsiao YY, Pan RL** (2005) Role of transmembrane segment 5 of the plant vacuolar H<sup>+</sup>-pyrophosphatase. *Biochim Biophys Acta* 1709: 84-94

**Villadsen D, Nielsen TH** (2001) N-terminal truncation affects the kinetics and structure of fructose-6-phosphate 2-kinase/fructose-2,6-bisphosphatase from *Arabidopsis thaliana*. *Biochem J* 359: 591-597

**von Caemmerer S** (2000) *Biochemical models of leaf photosynthesis*. CSIRO Publishing, Collingwood.

**von Caemmerer S, Furbank RT** (2003) The C-4 pathway: an efficient CO<sub>2</sub> pump. *Photosynth Res* 77: 191-207

**Walker GH, Huber SC** (1987) ATP-dependent activation of a new form of spinach leaf 6-phosphofructo-2-kinase/fructose 2,6-bisphosphatase. *Arch Biochem Biophys* 258: 58-64

**Whitaker DP** (1984) Purification and properties of sucrose-6-phosphatase from *Pisum sativum* shoots. *Phytochemistry* 23, 2429–2430.

**Winter H, Robinson DG, Heldt HW** (1993) Subcellular Volumes And Metabolite Concentrations In Barley Leaves. *Planta* 191: 180-190

**Woodrow IE, Walker DA** (1983) Regulation of stromal sedoheptulose 1,7-bis- phosphatase activity and its role in controlling the reductive pentose phosphate pathway of photosynthesis. *Biochim Biophys Acta* 722:508-516.

**Woodrow IE, Mott KA** (1993) Modeling C<sub>3</sub> photosynthesis—a sensitivity analysis of the photosynthetic carbon reduction cycle. *Planta* 191: 421–432

**Xu W, Ahmed S, Moriyama H, Chollet R** (2006) The importance of the strictly conserved, C-terminal glycine residue in phosphoenolpyruvate carboxylase for overall catalysis: mutagenesis and truncation of GLY-961 in the sorghum C<sub>4</sub> leaf isoform. *J Biol Chem* 281: 17238-17245

**Yu S, Xia D, Luo Q, Cheng Y, Takano T, Liu S** (2007) Purification and characterization of carbonic anhydrase of rice (*Oryza sativa* L.) expressed in *Escherichia coli*. *Protein Expr Purif* 52: 379-383

**Zelitch I** (1955). Glycolic acid oxidase and glyoxylic acid reductase. In SP Colowick, NO Kaplan, eds, *Methods in Enzymology*, Vol I. Academic Press, New York-London, pp 528-535

**Zhu X G, De Sturler E, Long SP** (2007) Optimizing the distribution of resources between enzymes of carbon metabolism can dramatically increase photosynthetic rate: A numerical simulation using an evolutionary algorithm. *Plant Physiol* 145: 513-526

**Ziegler I** (1974) Malate dehydrogenase in *Zea mays*: properties and inhibition by sulfite. *Biochim Biophys Acta* 364: 28-37
